# Comparative Genomics Reveal That Host-Innate Immune Responses Influence the Clinical Prevalence of *Legionella pneumophila* Serogroups

Mohammad Adil Khan<sup>1,2</sup>, Natalie Knox<sup>3</sup>, Akriti Prashar<sup>4</sup>, David Alexander<sup>1,2</sup>, Mena Abdel-Nour<sup>1,2</sup>, Carla Duncan<sup>1</sup>, Patrick Tang<sup>1</sup>, Hajera Amatullah<sup>5</sup>, Claudia C. Dos Santos<sup>5</sup>, Nathalie Tijet<sup>1</sup>, Donald E. Low<sup>1,2,6</sup>, Christine Pourcel<sup>7</sup>, Gary Van Domselaar<sup>4</sup>, Mauricio Terebiznik<sup>3</sup>, Alexander W. Ensminger<sup>1,8</sup>, Cyril Guyard<sup>1,2,6\*</sup>

**1** Public Health Ontario, Toronto, Ontario, Canada, **2** Department of Laboratory Medicine and Pathobiology, Faculty of Medicine, University of Toronto, Toronto, Ontario, Canada, **3** National Microbiology Laboratory, Public Health Agency of Canada, Winnipeg, Manitoba, Canada, **4** Cell and Systems Biology and Biological Sciences, University of Toronto at Scarborough, Scarborough, Ontario, Canada, **5** The Keenan Research Centre of the Li Ka Shing Knowledge Institute of St. Michael's Hospital, Toronto, Ontario, Canada, **6** Mount Sinai Hospital, Toronto, Ontario, Canada, **7** Institut de Génétique et Microbiologie, Université Paris-Sud, Paris, France, **8** Department of Molecular Genetics, Faculty of Medicine, University of Toronto, Toronto, Ontario, Canada

## Abstract

*Legionella pneumophila* is the primary etiologic agent of legionellosis, a potentially fatal respiratory illness. Amongst the sixteen described *L. pneumophila* serogroups, a majority of the clinical infections diagnosed using standard methods are serogroup 1 (Sg1). This high clinical prevalence of Sg1 is hypothesized to be linked to environmental specific advantages and/or to increased virulence of strains belonging to Sg1. The genetic determinants for this prevalence remain unknown primarily due to the limited genomic information available for non-Sg1 clinical strains. Through a systematic attempt to culture *Legionella* from patient respiratory samples, we have previously reported that 34% of all culture confirmed legionellosis cases in Ontario (n = 351) are caused by non-Sg1 *Legionella*. Phylogenetic analysis combining multiple-locus variable number tandem repeat analysis and sequence based typing profiles of all non-Sg1 identified that *L. pneumophila* clinical strains (n = 73) belonging to the two most prevalent molecular types were Sg6. We conducted whole genome sequencing of two strains representative of these sequence types and one distant neighbour. Comparative genomics of the three *L. pneumophila* Sg6 genomes reported here with published *L. pneumophila* serogroup 1 genomes identified genetic differences in the O-antigen biosynthetic cluster. Comparative optical mapping analysis between Sg6 and Sg1 further corroborated this finding. We confirmed an altered O-antigen profile of Sg6, and tested its possible effects on growth and replication in *in vitro* biological models and experimental murine infections. Our data indicates that while clinical Sg1 might not be better suited than Sg6 in colonizing environmental niches, increased bloodstream dissemination through resistance to the alternative pathway of complement mediated killing in the human host may explain its higher prevalence.

**Citation:** Khan MA, Knox N, Prashar A, Alexander D, Abdel-Nour M, et al. (2013) Comparative Genomics Reveal That Host-Innate Immune Responses Influence the Clinical Prevalence of *Legionella pneumophila* Serogroups. PLoS ONE 8(6): e67298. doi:10.1371/journal.pone.0067298

**Editor:** Yousef Abu Kwaik, University of Louisville, United States of America

**Received:** March 18, 2013; **Accepted:** May 16, 2013; **Published:** June 27, 2013

**Copyright:** © 2013 Khan et al. This is an open-access article distributed under the terms of the Creative Commons Attribution License, which permits unrestricted use, distribution, and reproduction in any medium, provided the original author and source are credited.

**Funding:** This work was supported by the Ontario Agency for Health Protection and Promotion (<http://www.oahpp.ca/>) and the Canadian Institutes of Health Research (MOP-102514) (<http://www.cihr-irsc.gc.ca/>). AP and MT are supported by the Natural Sciences and Engineering Research Council of Canada (<http://www.nserc-crsng.gc.ca/>) and the Ontario Association of Medical Laboratories grants (<http://www.oaml.com/>). The funders had no role in study design, data collection and analysis, decision to publish, or preparation of the manuscript.

**Competing Interests:** The authors have declared that no competing interests exist.

\* E-mail: [cyril.guyard@oahpp.ca](mailto:cyril.guyard@oahpp.ca)

## Introduction

Legionellosis is a potentially fatal infectious disease caused by Gram-negative, aerobic bacteria belonging to the genus *Legionella* [1,2]. Among 54 known *Legionella* species, *L. pneumophila* is the major cause of outbreaks (91.5%), and was the etiological agent of the first recognized outbreak in 1976 during a convention of the American Legion in Philadelphia [3,4,5,6]. The severity of this disease ranges from a mild respiratory illness to a rapidly fatal pneumonia [1,7]. The case fatality rate of legionellosis is between 40–80% in untreated immuno-suppressed patients but can be reduced to 5–30% with appropriate case management [7]. Legionellosis is a major public health concern in industrialized

nations [8,9,10]. From 2000 to 2009, a 217% increase in legionellosis cases was reported in the United States [11,12].

*Legionella* spp. are found worldwide and can be detected in up to 80% of man-made freshwater sites [13,14,15,16,17,18,19]. More recently, a study showed that *Legionella* spp can persistently colonize aquifers over several years [19]. In natural and in man-made water systems, *L. pneumophila* may exist as planktonic cells or as biofilms [20,21]. The bacteria can also be isolated from different protozoa in the environment [22,23,24]. This is an essential step in *L. pneumophila*'s life cycle, since the bacteria are able to replicate in the environment within the protozoa host [23,25]. The human infection results from the inhalation of aerosols contaminated with either infected protozoa or free floating *L. pneumophila* [26,27]. The

general model predicts, that upon inhalation, the infection starts with the invasion and replication in macrophage and epithelial cells of the lung [28,29]. Once inside the cell, *Legionella* replicate with in a non-acidified vacuolar environment [30,31]. While many genes required for surviving in amoeba are yet to be described, some like the *dot/icm* genes [32,33] have shown to be essential for survival in both the amoeba and the human host.

*L. pneumophila* have been classified into sixteen serogroups based on reactivity to specific monoclonal antibodies [34,35]. While these serogroups have been reported worldwide, Sg1 has historically been identified in most clinical cases (84.2%) [6]. The most widely used clinical diagnostic method for all suspected legionellosis cases are rapid, non-invasive, urine detection tests that recognize the presence of soluble antigen [36]. These clinical tests provide high sensitivity for Sg1 infection diagnosis but they are unable to detect most non-Sg1 strains [37,38]. Recently, we reported that 34% of culture confirmed cases of legionellosis in Ontario (n = 351) were caused by non-Sg1 *L. pneumophila* species in the last 3 decades [39]. Interestingly such a high percentage of non-Sg1 was also reported in some Scandinavian countries [40]. In a comparative clinical and environmental distribution analysis study, Sg1 was shown to constitute 28.2% of the *Legionella* spp. bacteria isolated from man-made water systems (n = 2,747) but 95.4% of clinical samples (n = 259) [41]. This suggests that the clinical prevalence of Sg1 might be independent of predominance in the environment, but rather to fitness or virulence advantages in the human host.

The underlying reasons for the clinical prevalence of Sg1 strains are a subject of active debate. A large, microarray multigenome analysis of 217 *L. pneumophila* isolates previously suggested that the clinical predominance of Sg1 may be linked to its specific lipopolysaccharide [42]. In this study, thorough population-based molecular epidemiology, we first identified the most clinically prevalent Sg6 strain among non-Sg1 clinical isolates in Ontario. Next, by combining next-generation sequencing with *in vitro* and *in vivo* experimental models, we performed a comparative analysis with the closest identified phylogenetic Sg1 (strain Philadelphia). Our results support a model in which increased resistance to serum complement, rather than variation in environmental fitness, explains the relative clinical prevalence of Sg1.

## Results

### Identification of Phylogenetic Clusters within non-Sg1 *L. pneumophila* Clinical Isolates

To identify prevalent population based clusters of non-Sg1 *L. pneumophila* clinical strains in Ontario, we conducted a phylogenetic analysis on 73 clinical isolates recovered between 1980 and 2009 using sequence based typing (SBT) and multiple-locus variable number tandem repeat analysis (MLVA). SBT based phylogenetic comparisons between different strains is accomplished by observing sequence variations of 7 allelic markers including house-keeping genes and known virulence factors [43,44]. MLVA takes advantage of the polymorphisms of 9 tandemly repeated DNA sequences [45]. The UPGMA analysis based on a matrix of pairwise allelic differences between all the sequence types (ST) of our dataset identified a large cluster (n = 40) comprising most of the Sg6 isolates of our repository. Isolates of this large cluster showed less phylogenetic diversity compared with other clusters and it encompassed 2 two main subclusters (Figure S1). The phylogenetic subcluster 1 included 17 isolates of Sg6 and ST 187 (Figure S1), while the phylogenetic subcluster 2 included 9 isolates who were all identified as Sg6 ST 68 (Figure S1). MLVA typing of this dataset, identified a large phylogenetic cluster as well,

comprising two subclusters, where cluster 1 grouped 20 isolates, and included Sg6 ST 187 and Sg6 ST 68, along with Sg4, Sg8 and Sg10 strains (Figure S2). Interestingly, cluster 2 had 10 isolates, out of which 8 were Sg6 ST 187, 1 was a Sg6 ST242 and 1 was a Sg3 ST93 (Figure S2). To further increase the discriminatory power of the molecular typing methods [46], we next constructed a phylogenetic tree combining SBT and MLVA profiles (Figure 1). This combined analysis confirmed that the largest phylogenetic cluster of non-sg1 clinical isolates comprised mainly of Sg6 ST187 and Sg6 ST68. In contrast to several other molecular types such Sg6 ST407 which had only been isolated over a period of 5 years, Sg6 ST187 and Sg6 ST68 strains seemed clonally stable, since isolates with identical sequence types have been obtained for 25 to 30 year periods of our repository (initiated in 1980). For the purposes of further analysis we selected strain Thunder Bay, Sudbury and Mississauga isolates as the representative ST187, ST68 and ST407, respectively. The high-prevalence of Sg6 among non-Sg1s was also confirmed through an inspection of the European Working Group for *Legionella* Infections (EWGLI) database (<http://www.ewgli.org/>) and has been reported independently elsewhere [41].

### The Optical Map of *L. pneumophila* Sg6 str. Thunder Bay and Sg12 str. 570-CO-H are Identical

Optical mapping is an emerging technology used for accurate genome assemblies [47] and for conducting comparative chromosomal analysis [48]. It allows for rapid identification of divergent regions, chromosomal rearrangement, and inversions [48,49,50]. We compared the relatedness of Sg6 str. Thunder Bay with other non-Sg1 and Sg1 strains, whose genomic sequences are available. First, we constructed an optical map of Sg6 str. Thunder Bay and compared it to *in silico* maps of Sg1 str. Philadelphia and Sg12 str. 570-CO-H (Figure 2A). The optical maps of Sg6 str. Thunder Bay and Sg1 str. Philadelphia only showed divergence in a 40 kB segment. This segment corresponded to genes involved in O-antigen biosynthesis. In contrast, Sg12 str. 570-CO-H showed a similar restriction pattern with Sg6 str. Thunder Bay. Secondly, we constructed an evolutionary tree based on optical maps of Sg6 str. Thunder Bay, Sg12 str. 570-CO-H and all sequenced and fully assembled Sg1 strains (Figure 2B). This analysis confirmed that the clinical non-Sg1 strains, Sg6 str. Thunder Bay and Sg12 str. 570-CO-H share a high degree of homology, and are phylogenetic neighbours of Sg1 str. Philadelphia.

### *L. pneumophila* Sg6 str. Thunder Bay Generates Higher Amounts of Biofilm Compared to Sg1 str. Philadelphia

The comparative optical map analyses identified serogroup specific genomic parameters. In order to investigate if these differences result in possible serogroup specific advantages between Sg1 str. Philadelphia and Sg6 str. Thunder Bay, we conducted comparative biological analysis at different stages of the *L. pneumophila* life-cycle. A strategy used by *L. pneumophila* to survive in anthropogenic aqueous environment is to generate biofilms [51]. The ability to generate higher amounts of biofilm can be directly correlated with persistence in the environment [52]. We determined that Sg6 str. Thunder Bay produces significantly higher levels of biofilm compared to Sg1 str. Philadelphia by 48 hours (P<0.05; Figure 3A). Furthermore, this difference further increased by 72 hours (P<0.05). This suggests that while Sg1 are able to generate significant amounts of biofilm, the Sg6 might possess an advantage that could explain its higher reported prevalence in some environmental surveys [53].



**Figure 1. Hybrid SBT-MLVA typing of a population based clinical repository of *L. pneumophila*.** Phylogenetic clusters were formed by UPGMA analysis of the combined typing data. Cluster 1 is identified in blue, while cluster 2 and 3 are shown in green and red, respectively.  
doi:10.1371/journal.pone.0067298.g001

***L. pneumophila* Sg6 str. Thunder Bay Replicates more Efficiently than Sg1 str. Philadelphia within *A. castellanii* Amoebae and U937 Derived Macrophages, but not in Lung Epithelial Cells**

In order to determine a possible advantage that either Sg1 or Sg6 may possess in infecting humans and surviving in the environment, we compared the replication rates of Sg1 str. Philadelphia and Sg6 str. Thunder Bay over 48 hours in the human lung epithelial cell line H292, U937 macrophages and *Acanthamoeba castellanii* amoeba models [54,55,56]. While no differences were observed in the lung epithelial cells (Figure 3B), significant increase of Sg6 str. Thunder Bay counts over Sg1 str. Philadelphia was seen by 48 hours in the macrophage model (Figure 3C). Similarly in amoeba, while no discernable difference was observed between the Sg1 and Sg6 strains one hour after uptake, by 24 hours, counts for the Sg6 strain were 28-fold higher compared to Sg1 str. Philadelphia (Figure 3D). At 48 hours, this difference had increased to 168-fold, suggesting that Sg6 str. Thunder Bay is able to infect and replicate more effectively than Sg1 str. Philadelphia in *A. castellanii* model. Taken together, these results suggest that the Sg6 str. Thunder Bay replicates more

efficiently than Sg1 str. Philadelphia within amoebae and macrophages. Thus Sg6 str. Thunder Bay might possess a fitness advantage in the environmental niche over the Sg1 str. Philadelphia, which is an unlikely explanation for the observed differences in clinical prevalence.

**The most Prevalent Molecular Types of Sg6 Strains Share a High Degree of Genomic Similarity**

To identify the factors that may be contributing to the population structure of *L. pneumophila* in clinical settings, we performed whole genome sequencing of Sg6 str. Thunder Bay. The *L. pneumophila* Sg6 str. Thunder Bay (accession number: CP003730) genome consists of a 3455167-bp chromosome with an average GC content of 38.24% (Table S1). A total of 3052 protein-encoding genes are predicted, 2299 (75.3%) of which have been assigned a putative function. A BLAST map analysis of Thunder Bay against five reference Sg1 strains showed several conserved regions (Figure 4A). Furthermore, high genomic strand asymmetry identified through the GC skew suggested no abnormalities in the assembly of the genome [57] (Figure 4A). To determine plasticity of the Sg6 genomes, we selected two additional strains from our clinical repository, Sg6 str. Sudbury (Accession number

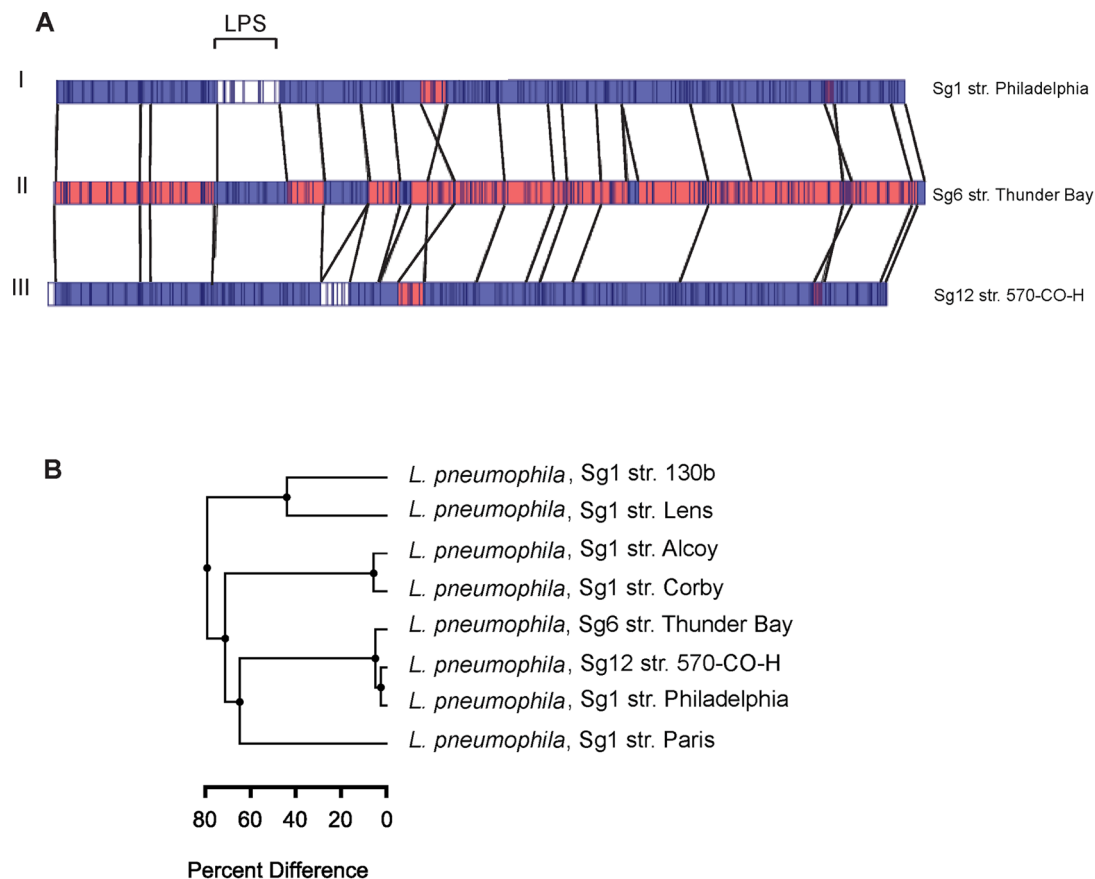

**Figure 2. Optical Maps and genome based comparisons of *L. pneumophila* strains.** (A) Optical map of *L. pneumophila* Sg6 str. Thunder Bay (Middle) compared to Sg1 strains Philadelphia (Top) and Sg12 570-CO-H (Bottom). The regions in white indicate unique gene clusters, while areas in blue depict high similarity to Sg6. Regions in red are conserved between all three genome sequences. (B) UPGMA based cluster analysis of optical maps of sequenced *L. pneumophila*.  
doi:10.1371/journal.pone.0067298.g002

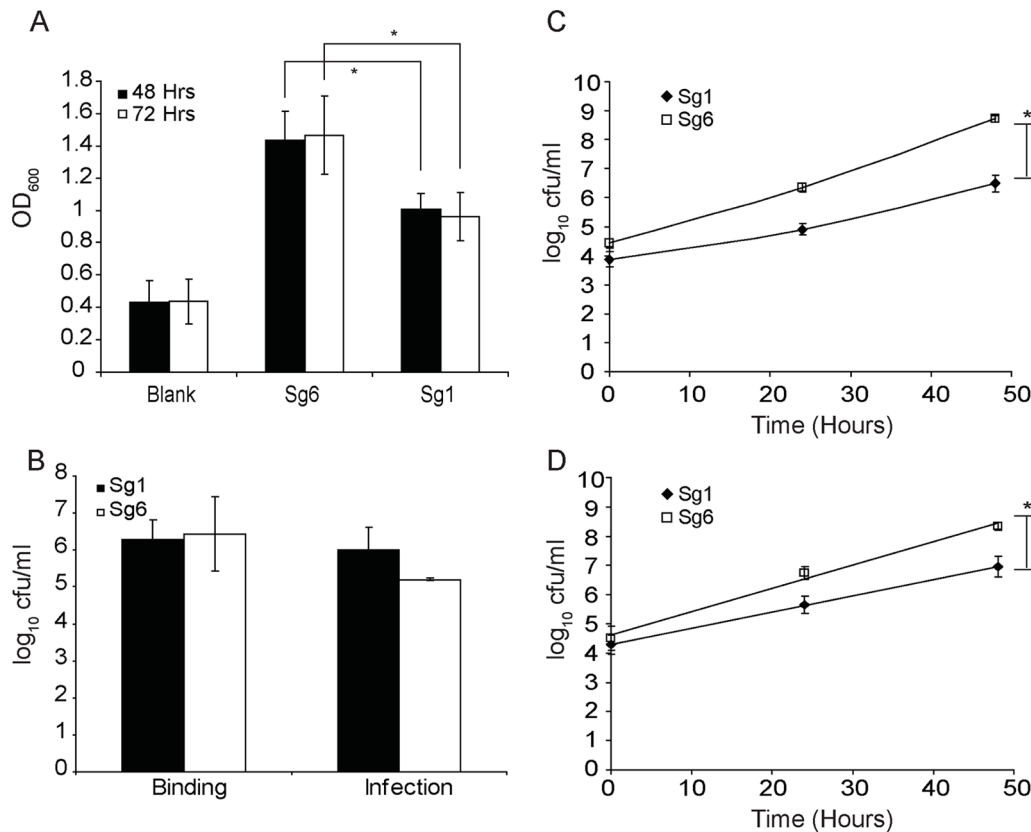

**Figure 3. Intracellular growth of *L. pneumophila*.** (A) Biofilm production by Sg1 and Sg6 (crystal violet staining, OD<sub>600 nm</sub>). (B) Binding and invasion of Sg6 str. Thunder Bay compared to Sg1 str. Philadelphia to/within human NCI-H292 lung epithelial cells. (C) Intracellular replication of *L. pneumophila* in *A. castellanii*. The magnitude of replication is reported in log<sub>10</sub> CFU/ml. (D) Intracellular growth of Sg6 str. Thunder Bay (square) compared to Sg1 str. Philadelphia (diamond) within U937 derived Human Macrophage cells. Each data point is an average of three independent experiments. For each experiment data was collected from 3 wells and a mean value was determined. \*denotes statistical significance as determined by a two-tailed student's t-test with a P-value <0.05. doi:10.1371/journal.pone.0067298.g003

PRJNA170020) and Sg6 str. Mississauga (Accession number PRJNA170014), and sequenced their genome using Illumina technology (paired-end). The genomes were *de novo* assembled into 29 and 37 contigs, respectively. By including these strains in our analysis, we report genomic data on most sequence types that were identified as Sg6 in our database. The genome size of Sg6 str. Sudbury (3351893 bp) and Sg6 str. Mississauga (3384301 bp) were comparable to that of the Sg6 str. Thunder Bay. Reference assembly of raw Illumina reads to the finished Sg6 str. Thunder Bay genome also indicated that Sg6 str. Sudbury was more closely related to Sg6 str. Thunder Bay (~4800 SNPs) than Sg6 str. Mississauga (~79,000 SNPs) (data not shown). Taking these SNP variations into consideration, the overall polymorphism between Sg6 str. Thunder Bay and Sg6 str. Sudbury only represents 0.13% of the Sg6 str. Thunder Bay genome while the polymorphism between Sg6 str. Mississauga and Sg6 str. Thunder Bay represents 2.28% of Sg6 str. Thunder Bay genome.

The *in silico* optical maps deduced from concatenated whole genome sequencing contigs of Sg6 str. Sudbury and Sg6 str. Mississauga were next compared to the optical maps of Sg6 str. Thunder Bay, Sg1 str. Philadelphia and Sg12 str. 570-CO-H (Figure 5A). Similarly to Sg12 str. 570-CO-H and Sg6 str. Thunder Bay, Sg6 str. Sudbury showed high similarity with Sg1 str. Philadelphia with the exception of the O-antigen biosynthesis segment. In contrast, differences between optical maps of Sg6 str. Mississauga and other strains were distributed around the

chromosome whereas the O-antigen biosynthesis segment was only partially conserved. An evolutionary tree based on optical maps of all sequenced Sg6 strains of our study, Sg12 str. 570-CO-H and all sequenced and fully assembled Sg1 strains was next constructed (Figure 5B). This analysis identified a cluster of strains with a relative low diversity compared to other genomes, this cluster included Sg6 str. Thunder Bay, Sg6 str. Sudbury, and Sg12 str. 570-CO-H and Sg1 str. Philadelphia. In contrast, the low prevalent Sg6 str. Mississauga did not cluster with Sg6 str. Thunder Bay and was relatively distant from its closest phylogenetic neighbours including Sg1 str. Alcoy and Sg1 str. Corby.

### Sg6 Genes Involved in O-antigen Biosynthesis Share Little Homology to the Sg1 Genomes

In order to identify genes that might confer differential prevalence of *L. pneumophila* serogroups, we compared the 2486 Sg1 proteins that have been previously described as the Sg1 core [58] for amino acid sequence homology with the Sg6 str. Thunder Bay predicted proteins. Forty three Sg1 core proteins shared less than 65% homology and were defined as divergent (Table S2, Figure 4B). While 35 amongst these were described as hypothetical proteins (HP), there was a cluster (~40 kB) of 11 predicted proteins that corresponded to O-antigen biosynthesis (lpg0738 to lpg0786). This result is in agreement with the optical map based comparative analysis between Sg1 str. Philadelphia and Sg6 str.



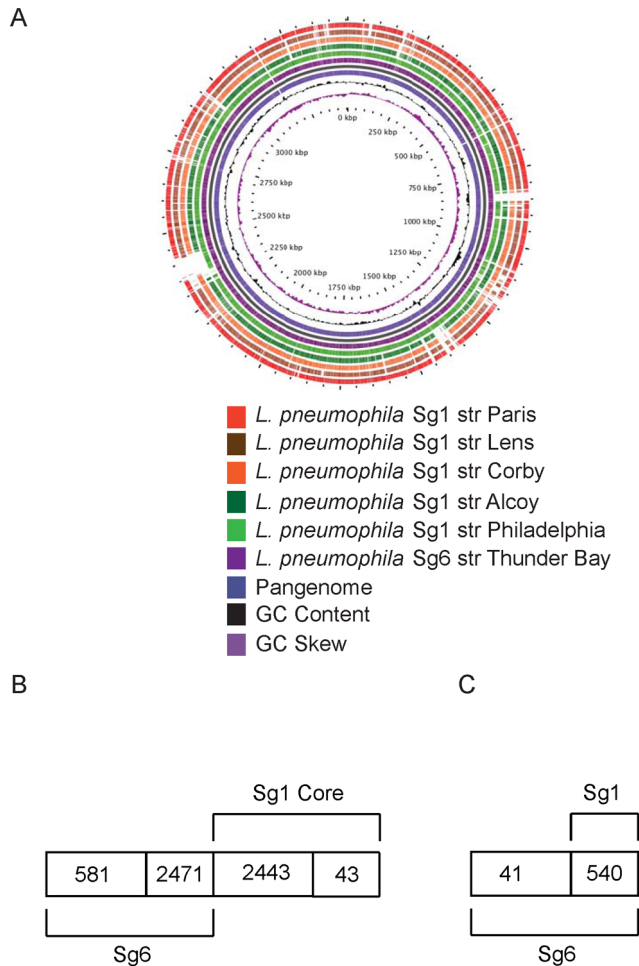

**Figure 4. Pangenome comparison of *L. pneumophila*.** (A) BLAST map of *L. pneumophila* Sg6 str. Thunder Bay against several Sg1 strains. (B) Number of conserved (>65% identity) and divergent (<65% identity) proteins between Sg6 and a subset of core Sg1 proteins. Numbers showed in italics represent number of proteins that were considered homologous. (C) Conserved (>65% identity) and divergent (<65% identity) proteins among the unique Sg6 genes from panel B and all known Sg1 genes.  
doi:10.1371/journal.pone.0067298.g004

Thunder Bay, which identified the O-antigen biosynthetic cluster of Sg1 as divergent. This is also in agreement with a previous study revealing that Sg1 LPS gene cluster spanning lpp0827 (*galE*) to lpp0843 of *L. pneumophila* Sg1 str. Paris is highly divergent from those of Sg6, Sg10, Sg12, Sg13 and Sg14 [59]. Some other predicted proteins that were outside of this cluster included MreD (lpg0813) and LvrB (lpg1258). The role of LvrB has been characterized in several bacterial pathogens and has been shown to be essential in the formation of the Type IVA (lvh) secretion system [60,61,62,63]. MreD has also been described in several bacteria, and has been shown to be involved in controlling cell wall biosynthesis and bacterial morphology [64,65]. In our study, no morphological difference was observed between the Sg1 and Sg6 using differential interference contrast microscopy (data not shown).

In a reverse comparison, 581 Sg6 str. Thunder Bay proteins were defined as divergent compared to the Sg1 core. Amongst these only 41 were considered divergent to all *L. pneumophila* in the Genbank database (Table 1, Figure 4C). Twenty three of these

Sg6-specific proteins were identified from the O-antigen biosynthetic cluster, and included proteins like Wzm (lp6\_749), Wzt (lp6\_750), GalE (lp6\_758) and WecA (lp6\_759), whose role in O-antigen biosynthesis is well described [66,67,68,69]. Notably a previous study failed to identify the presence of many of the genes coding for O-antigen biosynthesis proteins by DNA microarray in all non-Sg1 tested [42]. Our results suggest that this may have been due to low sequence homology of these genes with their Sg1 orthologs. Interestingly, the Thunder Bay O-antigen cluster was fully conserved in the Sg6 str. Sudbury, but showed low homology in Wzt and *N*-acetyltransferase when compared to Sg6 str. Mississauga.

Four Sg6 str. Thunder Bay proteins were defined as unique based on sequence homology with predicted proteins from all Sg1 genomic sequences (Table 1). Amongst these, three predicted proteins are coded by genes laying outside the O-antigen cluster and were classified as hypothetical proteins and XerD (lp6\_1224), a site specific recombinase (Blakely and Sherratt, 1994). The remaining two proteins are coded by genes situated within the O-antigen cluster and included PseG (lp6\_763), whose homologs have been shown to play a role in pseudaminic acid biosynthesis in *Campylobacter jejuni* and *Pseudomonas aeruginosa* [70,71]. Even though pseudaminic acid has not been detected in *L. pneumophila*, a nine-carbon alpha-keto acid called legionaminic acid which belongs to the sialic acid family is generated by NeuA, NeuB and NeuC (Glaze et al., 2008). This acid is known to be a structural component of the *L. pneumophila* O-antigen. In agreement with a previous comparative analysis of *L. pneumophila* serogroup LPS clusters [59], this divergent O-antigen biosynthesis cluster were 100% homologous with corresponding *L. pneumophila* Sg12 str. 570-CO-H proteins (Table 2). At the DNA level, the region spanning Lp6\_758 (*galE*) to Lp6\_782 of Sg6 str. Thunder Bay showed respectively a 99% and 100% identity with the previously reported regions of Sg6 str. ATCC33215 and Sg12 str. ATCC43290 [59].

We next defined a non-Sg1 core of 2946 proteins, by comparing Sg6 str. Thunder Bay and Sg12 str. 570-CO-H predicted proteins [72] (Table S3). Upon comparing with the Sg1 core, 435 proteins were defined as divergent from the non-Sg1 core. This included the O-antigen biosynthetic cluster, flagellar assembly, T4SS substrates and some metabolic enzymes. Interestingly, amongst the 2486 Sg1 core proteins, only 79 were defined as divergent compared to the non-Sg1 core (Table S4), and included genes from O-antigen biosynthetic cluster and the Lvh region of the type IV-A secretion system [73]. These differences might reflect the discrepancy in growth and replication in the environment or the human host.

#### Differences in the O-antigen Structure of Sg1 Confer Resistance to the Alternative Complement Pathway

Comparative genomics and optical mapping analysis of the Sg6 str. Thunder Bay genome revealed that the O-antigen biosynthetic proteins present major variations with respect to the Sg1 str. Philadelphia (Figure 6A). Therefore, we predicted that there might be changes in the O-antigen generated by Sg1 str. Philadelphia and Sg6 str. Thunder Bay. To verify this hypothesis, purified lipopolysaccharide (LPS) from these strains were visualized through SDS-PAGE. Sg1 displayed a classic ladder pattern (Tsai and Frasch, 1982), which suggests that the O-antigen is highly decorated [74]. Conversely, the Sg6 O-antigen appears to be minimally decorated and lacked higher molecular weight species (Figure 6B). Our Sg6 str. Thunder Bay profile is in agreement with a previous study that analyzed LPS from Sg6 str. MP [75]. Previously, differences in O-antigen profiles have been used to

A

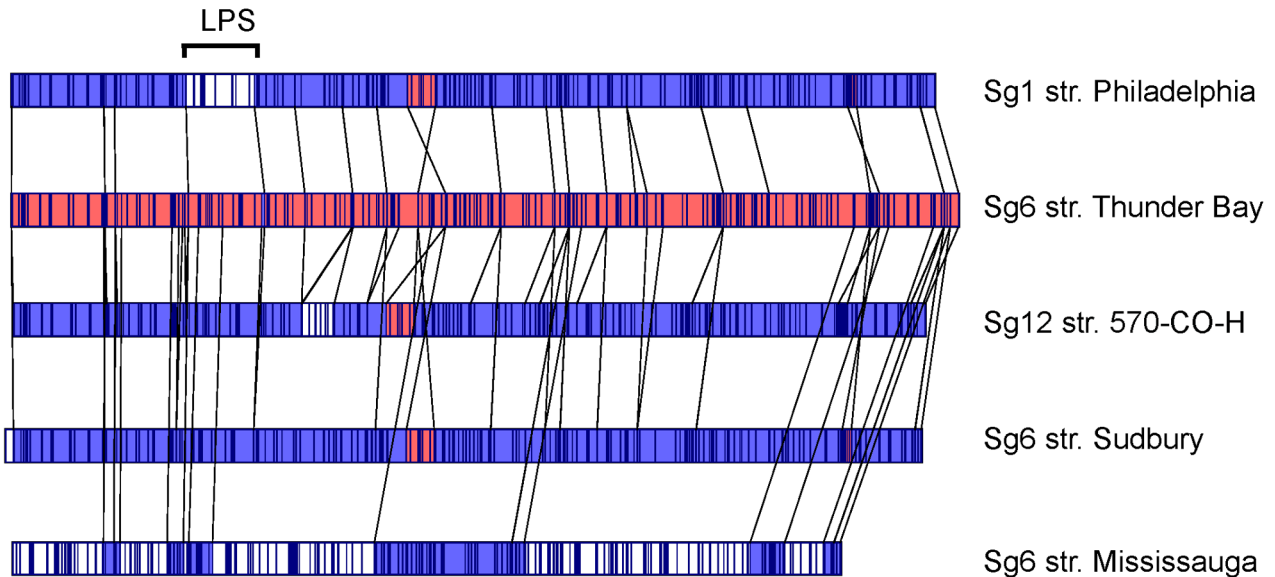

B

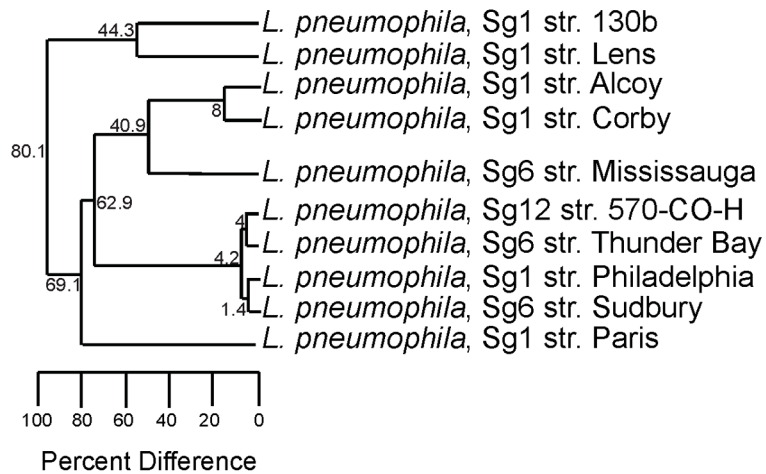

**Figure 5. Optical Maps and genome based comparisons of *L. pneumophila* strains.** (A) Optical map of *L. pneumophila* Sg6 str. Thunder Bay (Middle) compared to Sg1 strains Philadelphia (Top) and Sg12 570-CO-H (Bottom). The regions in white indicate unique gene clusters, while areas in blue depict high similarity to Sg6. Regions in red are conserved between all three genome sequences. (B) UPGMA based cluster analysis of optical maps of sequenced *L. pneumophila*. Percent difference at each node is indicated.  
doi:10.1371/journal.pone.0067298.g005

define distinct serogroups [76,77], and are hypothesized to be associated to differences in virulence of *L. pneumophila* serogroups in humans [42].

Variations in the outer-membrane O – antigen segment of the LPS can provide resistance to complement mediated serum killing in pathogenic bacteria [78,79,80]. The differences observed in the O – antigen structure of Sg1 str. Philadelphia and Sg6 str. Thunder Bay indicated that there might be differential sensitivity to serum complement. Indeed when the Sg6 was treated with Non-immune Human Serum (NHS), a 35% and a 73% decrease in colony forming units (CFUs) was seen by 45 and 120 min, respectively (Figure 6C). However, no effect was observed for Sg1. Sg6 and Sg1 viability was not affected by decomplexed (heat inactivated) NHS, consistent with a Sg6-specific killing by heat-

sensitive complement. These results suggest that Sg6 O-antigen is unable to provide any appreciable resistance to serum complement, whereas Sg1 O-antigen may allow the bacteria to escape complement mediated killing by naive human serum.

We next measured the sensitivity of Sg1 str. Philadelphia and Sg6 str. Thunder Bay to the classical complement pathway using sera obtained from patients diagnosed with either Sg1 or Sg6 infections (Figure 7A). Presence of either Sg1 or Sg6 specific antibodies was previously confirmed through IFA (data not shown). The Sg1 str. Philadelphia isolate showed a 72.5% decrease in CFU after a 60 min incubation in sera containing Sg1 antibodies, an effect that was not observed in decomplexed patient sera. In presence of Sg6 specific antibodies, the Sg1 str. Philadelphia CFUs were decreased by 31.5% at 60 min. The Sg6

**Table 1.** Divergent proteins present in Sg6 str. Thunder Bay compared to all sequenced Sg1 genomes in the Genbank database.

| Sg6 Locus | Gene Name | Gene Description                                 | Identity to Sg1 | Sg1 Locus | Gene Name | Gene Description                                |
|-----------|-----------|--------------------------------------------------|-----------------|-----------|-----------|-------------------------------------------------|
| Lp6_186   |           | HP                                               | 43              | lpg0112   |           | HP                                              |
| Lp6_749   | Wzm       | LPS O-antigen ABC transporter                    | 48              | lpp0837   | Wzm       | LPS O-antigen ABC transporter                   |
| Lp6_750   | Wzt       | LPS O-antigen ABC transporter                    | 63              | lpg0773   | Wzt       | LPS O-antigen ABC transporter                   |
| Lp6_755   |           | HP                                               | 52              | lpg0763   |           | HP                                              |
| Lp6_758   | GalE      | UDP-glucose 4-epimerase                          | 61              | lpg0761   |           | HP                                              |
| Lp6_759   | WecA      | $\alpha$ -N-acetylglucosaminyltransferase        | 57              | lpg0762   | WecA      | O-antigen initiating glycosyl transferase       |
| Lp6_761   |           | HP                                               | 48              | lpg0788   |           | HP                                              |
| Lp6_762   |           | GCN5-related N-acetyltransferase                 | 29              | lpp1089   |           | Streptomycin 3'-adenylyltransferase             |
| Lp6_763   | PseG      | Pseudaminic acid biosynthesis-associated protein |                 |           |           |                                                 |
| Lp6_764   |           | Glutamate-1-semialdehyde 2,1-aminomutase         | 37              | lpg0467   | LasB      | Zinc metalloprotease                            |
| Lp6_765   | GlmU1     | Acylneuraminate cytidylyltransferase             | 31              | lpg1919   | KdsB      | 3-deoxy-manno-octulosonate cytidylyltransferase |
| Lp6_766   |           | Acetyltransferase                                | 50              | lpg2848   |           |                                                 |
| Lp6_767   | HisF4     | Imidazoleglycerol-phosphate synthase             | 35              | lpg0749   | HisF      | Imidazole glycerol phosphate synthase           |
| Lp6_768   | HisH2     | Imidazole glycerol phosphate synthase            | 48              | lpp2859   | HisH      | Imidazole glycerol phosphate synthase           |
| Lp6_769   |           | LPS biosynthesis protein                         | 38              | lpg0786   |           | HP                                              |
| Lp6_770   |           | Aryl-alcohol dehydrogenase-like oxidoreductase   | 24              | lpg2848   |           | Ribonuclease                                    |
| Lp6_771   | DegT      | Aminotransferase                                 | 52              | lpl0206   |           | HP                                              |
| Lp6_772   | CapD      | Polysaccharide biosynthesis protein              | 59              | lpg0561   | PhaB      | Acetoacetyl-CoA reductase                       |
| Lp6_773   |           | HP                                               | 38              | lpg0635   |           |                                                 |
| Lp6_774   |           | Capsule polysaccharide biosynthesis protein      |                 |           |           |                                                 |
| Lp6_775   | NeuB      | N-acetylneuraminic acid synthetase               | 38              | lpp0818   | NeuB      | N-acetylneuraminic acid synthetase              |
| Lp6_776   |           | HP                                               | 47              | lpa3427   |           | HP                                              |
| Lp6_777   |           | HP                                               |                 |           |           |                                                 |
| Lp6_780   |           | HP                                               | 31              | lpg0774   |           | HP                                              |
| Lp6_781   |           | Dehydrogenase                                    | 29              | lpg1888   |           | HP                                              |
| Lp6_782   |           | Dehydrogenase                                    | 36              | lpg2974   | Psd       | Phosphatidylserine decarboxylase                |
| Lp6_825   |           | HP                                               | 47              | lpg1344   | DedE      | Colicin V                                       |
| Lp6_828   |           | UDP-N-acetyl-D-galactosamine dehydrogenase       | 23              | lpg1942   |           | 3-hydroxyacyl CoA dehydrogenase                 |
| Lp6_829   |           | UDP-glucose 4-epimerase                          | 33              | lpg2214   |           | Nucleoside-diphosphate sugar epimerase          |
| Lp6_830   |           | Starch synthase                                  | 35              | lpp3018   |           | HP                                              |
| Lp6_831   |           | HP                                               | 22              | lpg2485   |           | HP                                              |
| Lp6_832   |           | HP                                               | 32              | lpg2015   | ProC      | Proline-5-carboxylate reductase                 |
| Lp6_833   |           | Glycosyl transferase family 2                    | 35              | lpg1183   |           | HP                                              |
| Lp6_976   |           | HP                                               | 56              | lpg0981   |           | HP                                              |
| Lp6_977   | YwfO      | Phosphohydrolase                                 | 45              | lpg1267   |           | HP                                              |
| Lp6_1186  |           | HP                                               |                 |           |           |                                                 |
| Lp6_1249  | XerD      | Integrase/recombinase                            |                 |           |           |                                                 |
| Lp6_2002  |           | integrase                                        | 59              | lpc1833   |           | HP                                              |
| Lp6_2003  |           | Protein of unknown function DUF1016              | 34              | lpg1228   |           | HP                                              |
| Lp6_2041  |           | HP                                               | 50              | lpp0850   |           | HP                                              |
| Lp6_2164  |           | HP                                               | 44              | lpg1480   | MutH      | DNA mismatch repair protein                     |

Proteins were defined as divergent when they shared less than 65% homology and 75% coverage. HP identifies hypothetical proteins.  
doi:10.1371/journal.pone.0067298.t001

str. Thunder Bay counts, when incubated with Sg1 antibodies were decreased by 98.8%, and similarly decreased by 99.3% in



**Table 2.** Comparative proteomics analysis between divergent proteins identified in Table 1 and *L. pneumophila* Sg12 str. 570-CO-H.

| Sg6 Locus | Gene Name | Gene Description                                 | Identity to Sg12 | Sg12 Locus | Gene Name | Gene Description                                |
|-----------|-----------|--------------------------------------------------|------------------|------------|-----------|-------------------------------------------------|
| Lp6_186   |           | HP                                               | 82               |            | lp12_2703 | Phenylalanyl tRNA synthetase                    |
| Lp6_749   | Wzm       | LPS O-antigen ABC transporter                    | 100              | Wzm        | lp12_0766 | Polysaccharide ABC transporter                  |
| Lp6_750   | Wzt       | LPS O-antigen ABC transporter                    | 100              | Wzt        | lp12_0767 | LPS O-antigen ABC transporter                   |
| Lp6_755   |           | HP                                               | 100              |            | lp12_0772 | HP                                              |
| Lp6_758   | GalE      | UDP-glucose 4-epimerase                          | 100              |            | lp12_0775 | Putative NAD dependent epimerase                |
| Lp6_759   | WecA      | $\alpha$ -N-acetylglucosaminyltransferase        | 100              |            | lp12_0776 | $\alpha$ -N- acetylglucosaminyltransferase      |
| Lp6_761   |           | Hypothetical protein                             | 100              |            | lp12_0778 | HP                                              |
| Lp6_762   |           | GCN5-related N-acetyltransferase                 | 100              |            | lp12_0779 | N-Acyltransferase                               |
| Lp6_763   | PseG      | Pseudaminic acid biosynthesis-associated protein | 100              |            | lp12_0780 | putative polysaccharide biosynthesis protein    |
| Lp6_764   |           | Glutamate-1-semialdehyde 2,1-aminomutase         | 100              |            | lp12_0781 | Putative aminotransferase class-III             |
| Lp6_765   | GlmU1     | Acylneuraminate cytidylyltransferase             | 100              |            | lp12_0782 | Putative glycosyltransferase                    |
| Lp6_766   |           | Acetyltransferase                                | 100              |            | lp12_0783 | Putative N-acetyltransferase                    |
| Lp6_767   | HisF4     | Imidazoleglycerol-phosphate synthase             | 100              | HisF       | lp12_0784 | Putative imidazole glycerol phosphate synthase  |
| Lp6_768   | HisH2     | Imidazole glycerol phosphate synthase            | 100              | HisH       | lp12_0785 | Putative imidazole glycerol phosphate synthase  |
| Lp6_769   |           | LPS biosynthesis protein                         | 100              |            | lp12_0786 | LPS biosynthesisprotein                         |
| Lp6_770   |           | Aryl-alcohol dehydrogenase-like oxidoreductase   | 100              |            | lp12_0787 | Putative aldo/keto reductase                    |
| Lp6_771   | DegT      | Aminotransferase                                 | 100              |            | lp12_0788 | AHBA synthase                                   |
| Lp6_772   | CapD      | Polysaccharide biosynthesis protein              | 100              | CapD       | lp12_0789 | Putative polysaccharide biosynthesis protein    |
| Lp6_773   |           | HP                                               | 100              |            | lp12_0790 | HP                                              |
| Lp6_774   |           | Capsule polysaccharide biosynthesis protein      | 100              |            | lp12_0791 | HP                                              |
| Lp6_775   | NeuB      | N-acetylneuraminic acid synthetase               | 100              | NeuB       | lp12_0792 | Putative N-acetylneuramic acid synthetase       |
| Lp6_776   |           | HP                                               | 100              |            | lp12_0793 | Putative methyltransferase                      |
| Lp6_777   |           | HP                                               | 100              |            | lp12_0794 | Putative aminopeptidase                         |
| Lp6_780   |           | HP                                               | 100              |            | lp12_0797 | HP                                              |
| Lp6_781   |           | Dehydrogenase                                    | 100              |            | lp12_0798 | Putative dehydrogenase                          |
| Lp6_782   |           | Dehydrogenase                                    | 100              |            | lp12_0799 | Oxidoreductase domain-containing protein        |
| Lp6_825   |           | HP                                               | 48               | FtsY       | lp12_2663 | Cell division membrane protein                  |
| Lp6_828   |           | UDP-N-acetyl-D-galactosamine dehydrogenase       | 100              |            | lp12_0849 | UDP-glucose/GDP-mannose dehydrogenase           |
| Lp6_829   |           | UDP-glucose 4-epimerase                          | 100              |            | lp12_0850 | NAD dependent epimerase                         |
| Lp6_830   |           | Starch synthase                                  | 100              |            | lp12_0851 | Putative Starch synthase                        |
| Lp6_831   |           | HP                                               | 100              |            | lp12_0852 | TRP containing protein                          |
| Lp6_832   |           | HP                                               | 100              |            | lp12_0853 | HP                                              |
| Lp6_833   |           | Glycosyl transferase family 2                    | 100              |            | lp12_0854 | Glycosyl transferase                            |
| Lp6_976   |           | HP                                               | 54               |            | lp12_1008 | Putative integrase                              |
| Lp6_977   | YwfO      | Phosphohydrolase                                 | 63               |            | lp12_1057 | Deoxyguanosine triphosphate triphosphohydrolase |
| Lp6_1186  |           | HP                                               | 38               |            | lp12_0204 | Cytochrome D ubiquinol oxidase                  |
| Lp6_1249  | XerD      | Integrase/recombinase                            | 62               |            | lp12_2416 | HP                                              |
| Lp6_2002  |           | integrase                                        | 100              |            | lp12_2057 | integrase                                       |
| Lp6_2003  |           | Protein of unknown function DUF1016              | 100              |            | lp12_2058 | HP                                              |
| Lp6_2041  |           | HP                                               | 100              |            | lp12_2105 | HP                                              |
| Lp6_2164  |           | HP                                               | 100              |            | lp12_0810 | HP                                              |

HP identifies hypothetical proteins.  
doi:10.1371/journal.pone.0067298.t002

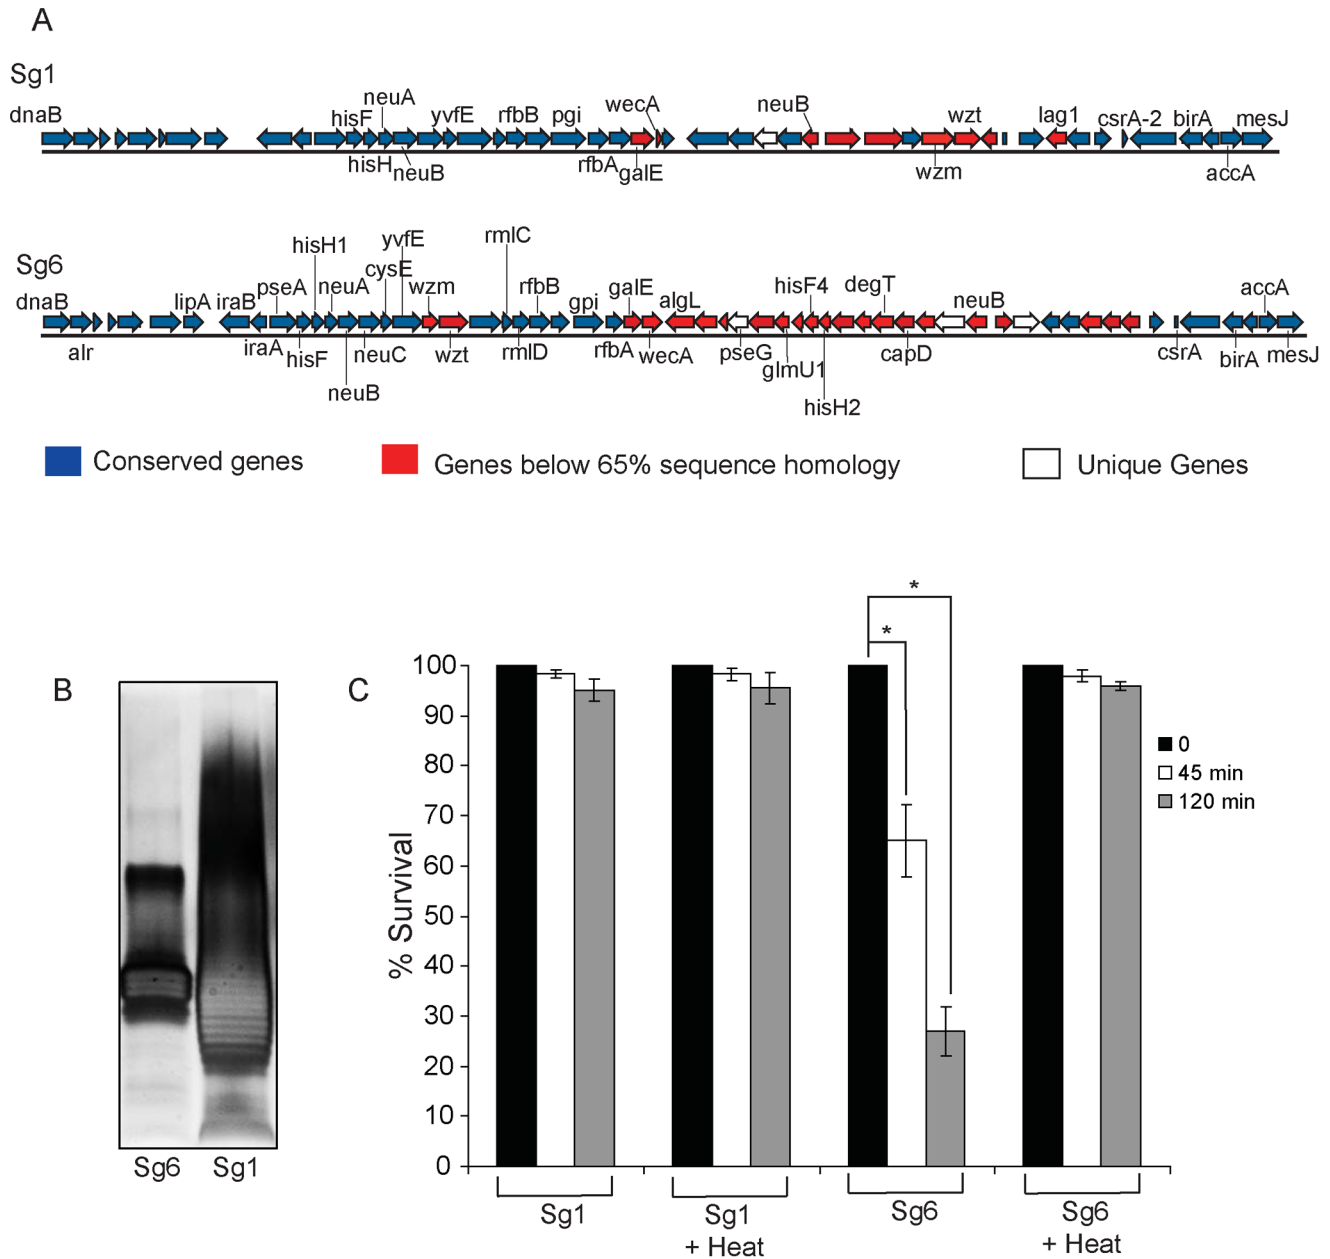

**Figure 6. The O-antigen locus of *L. pneumophila*.** (A) Layout of O-antigen region in Sg1 str. Philadelphia and Sg6 str. Thunder Bay in the area of highest dissimilarity, corresponding to the LPS gene cluster. (B) 16% SDS gel analysis of purified LPS from Sg1 str. Philadelphia and Sg6 str. Thunder Bay. (C) Comparative serum resistance of (Sg1) Sg1 str. Philadelphia and (Sg6) Sg6 str. Thunder Bay in Non-immune Human Serum. Presented data are an average of three independent experiments. \*denotes statistical significance as determined by a two-tailed student's t-test with a P-value <0.05. doi:10.1371/journal.pone.0067298.g006

Sg6 patient sera. Taken together, these results suggest that while Sg1 str. Philadelphia is resistant to the alternate complement system, it is highly sensitive to the classical pathway of complement mediated killing. Furthermore, Sg1 are more sensitive to this pathway in the presence of Sg1 specific antibodies, while the Sg6 can be targeted by both Sg1 and Sg6 antibodies.

The above experiments suggested that the high prevalence of Sg1 in patient cases might be related to higher resistance to serum complement. We hypothesized that we might observe a similar correlation between clinical prevalence and resistance to the alternative complement pathway amongst the non-Sg1 strains in our repository. From this set, we selected the most prevalent

sequence type for each serogroup, and measured their survival in NHS (Figure 7B). The highest CFU/ml counts were obtained for Sg6 strains Thunder Bay and Sudbury, which account for 20% and 10.6% of all non-Sg1 infections, respectively. Interestingly Sg6 str. Mississauga, which account for only 2.35% of all clinical cases, showed a marked reduction in survivability compared to Thunder Bay and Sudbury strains (Figure 7C). All other serogroups that shared similar prevalence as Sg6 str. Mississauga, exhibited high sensitivities to serum complement. These results strongly indicate that while all non-Sg1's are sensitive to serum complement, the degree of susceptibility correlates strongly with clinical prevalence.

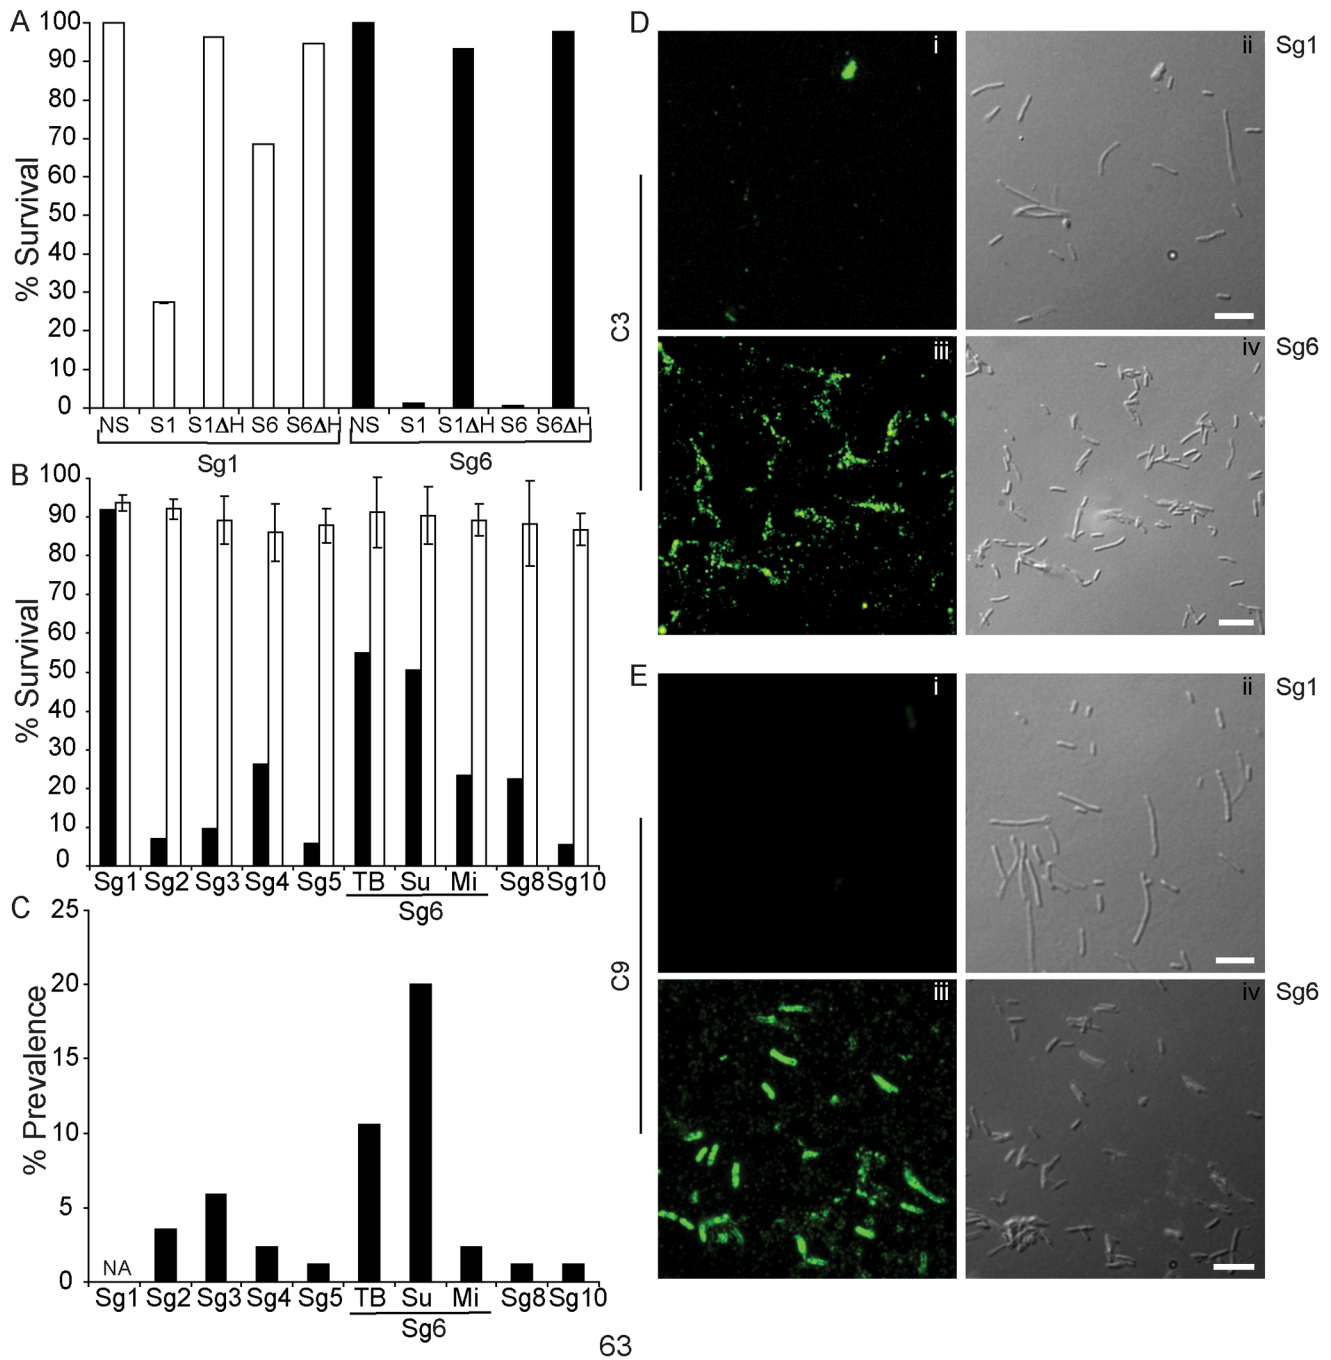

**Figure 7. Serum Resistance of non-Sg1 *L. pneumophila*.** (A) Percentage survival of Sg1 str. Philadelphia vs Sg6 str. Thunder Bay in the presence of no Serum (NS), serum with Sg1 antibodies (S1), S1 heated for 30 min at 56°C (S1ΔH), serum with Sg6 antibodies (S6) and S6 heated for 30 min at 56°C (S6ΔH). (B) Percentage survival of *L. pneumophila* serogroups after incubation in 90% non-immune human serum for 1 hour at 37°C. Both panels A and B are an average of three independent experiments. (C) Relative prevalence of non-SG1 in the clinical isolates database maintained at Public Health Ontario Laboratories. (D) Immunodetection of complement proteins C<sub>3</sub> and (E) C<sub>9</sub> at the surface of NHS treated Sg1 str. Philadelphia vs Sg6 str. Thunder Bay. Panels on the left are fluorescent captures of the differential interference contrast images on the right. The bacteria are seen as individual rods in these images. Images were acquired using Quorum Optigrad microscope with a 63× oil immersion objective (Leica DMI6000B stand with a Hamamatsu EM-1K, EMCCD camera). Image acquisition and post-acquisition processing was performed using Volocity 4.3 software (Improvision). doi:10.1371/journal.pone.0067298.g007

**Serum Complement Proteins are able to Bind to the Surface of Sg6 but not Sg1**

Serogroup specific differences in complement resistance may be reflected in the efficiency to avoid the formation of membrane

attack complex (MAC) [81,82]. MAC forms transmembrane channels in the bacterial membrane, leading to depolarization and cell death [83]. We compared the binding of complement proteins C<sub>3</sub> and C<sub>9</sub> to the surfaces of Sg1 str. Philadelphia and Sg6 str.

Thunder Bay by indirect fluorescent antibody (IFA). C<sub>3</sub> protein is able to bind to the LPS of bacteria and provides the scaffold for the membrane attack complex [84,85]. The binding of the C<sub>9</sub> protein completes the membrane attack complex, which leads to bacterial death [85,86,87]. Our experiments indicate that while only residual amounts of C<sub>3</sub> bind Sg1 (Figure 7D i), significant quantities were detected on the Sg6 surface (Figure 7D iii). This subsequently led to the detection of C<sub>9</sub> on Sg6 (Figure 7E iii), but absent from Sg1 surfaces (Figure 7E i). This result suggests that the membrane attack complex can be assembled in Sg6 but not in Sg1, highlighting Sg6's sensitivity to the alternative complement pathway.

### Sg1 Disseminates more Efficiently than Sg6 in the A/J Mice Infection Model

The different serum resistance profiles of Sg1 and Sg6 suggested that these serogroups might differ in their ability to cause infection in the lungs and/or dissemination to other organs. In order to test this hypothesis, we infected A/J mice intratracheally with Sg1 str. Philadelphia or Sg6 str. Thunder Bay and determined the severity of the disease 48 hours post intra-tracheal inoculation [88,89]. Forty eight hours post infection, mice infected (n = 5) with Sg1 showed symptoms of distress as indicated by ruffled fur, loss of appetite and lethargy. Conversely, mice infected with Sg6 (n = 5) displayed no deviation from normal behaviour and appearance. Furthermore, while no significant differences were seen in bacterial counts in the lungs, a 100-fold increase was noted for Sg1 in blood. Similarly, 100-fold and 10-fold increases were also seen for Sg1 in kidneys and liver, respectively (Figure 8). Surprisingly, no differences were observed in the spleens. This data suggests that while both Sg1 and Sg6 cause similar level of infections in the lung, they differ in their ability to induce bacteraemia and disseminate to other organs. Severe complications associated with Legionnaire's disease are well documented and include septicemia and multi-organ failure [90,91]. Therefore, our data are in agreement with the clinical manifestations of Legionnaire's disease, and suggests that bloodstream dissemination

of *L. pneumophila* is a key determining factor of the severity of legionellosis.

## Discussion

The human host provides a challenging environment for the survival of pathogens. Given that no human to human transmission has been reported for *L. pneumophila*, the clinical prevalence of *L. pneumophila* Sg1 over other serogroups poses a puzzling problem, since any Sg1 specific advantage in the human host must be a secondary consequence to an environmental benefit. Here, we thoroughly investigated this question by reporting a comprehensive study comparing the genomes, the clinical impact, the environmental fitness and the pathogenicity of a clinically prevalent Sg6 strain with a phylogenetically related Sg1 strain.

By combining MLVA and SBT analyses of a population based repository of non-Sg1 clinical isolates, we could identify a large cluster of prevalent molecular types presenting a low diversity. At the phylogenetic level, isolates from this cluster seem clonally stable as they have been collected for over 30 years. Based on this finding, a member of this cluster, Sg6 str. Thunder Bay, was selected for further analyses. Given the high plasticity of previously reported *Legionella* genomes, the optical maps of Sg6 str. Thunder Bay and Sg1 str. Philadelphia showed a high degree of similarity in genomic structure and restriction pattern, except for one large divergent region that includes several genes involved in O-antigen biosynthesis [49]. Furthermore, a comparison of Sg6 str. Thunder Bay and Sg12 str. 570-CO-H optical maps identified the O-antigen region to be conserved between these two sequenced non-Sg1 strains. Comparative genomics analysis was consistent with our optical mapping experiments, where a majority of genetic differences between Sg1 str. Philadelphia and Sg6 str. Thunder Bay were identified in the O-antigen biosynthetic cluster. The potential role of the LPS cluster in the predominance of Sg1 was initially hypothesised in a large multigenome microarray analysis of *L. pneumophila* strains [42]. More recently, the O-antigen regions of several serogroups were sequenced and compared using a PCR/Sanger sequencing approach. Using this approach, O-antigen biosynthetic genes *wzt*, *wzm* and *lag1* were only identified in Sg1 and it was postulated that these genes might be absent in other serogroups [59]. Here, while at the protein level they only share low homology with the Sg1 and discrepancies with previous reports may be explained by the use of different comparative genomics cut-off values, next generation sequencing approaches allowed us to identify distant homologues of *wzm*, *wzt* and *galE* genes in Sg6. Together Wzm and Wzt form the inner membrane O-antigen transporter [92,93] and GalE is a cytoplasmic epimerase that converts UDP-Galactose to UDP-Glucose upon which the remaining O-antigen sugars are assembled [94]. Lag1 was previously described as an O-acetyltransferase in some Sg1 strains [95], shared less than 50% sequence identity with a predicted AlgL an alginate acetyltransferase in all three Sg6 strains and Sg12 str. 570-CO-H. Although, mutations in *lag-1* have been associated with lack of the 8-O-acetyl groups in legionaminic acid leading to polymorphic changes in the LPS, these modifications were shown to have no effect on serum resistance or uptake in amoeba [96]. Interestingly, it has been proposed that the 8-O-acetylation of first three O-antigen sugars, which are located closest to the core sugars, might occur via a Lag1 independent pathway [95].

The chemical structure of Sg1 O-antigen is very unusual due to its atypical hydrophobic nature, owing to the presence of a homopolymer of legionaminic acid on its surface [97]. Previous analysis of the LPS from non-Sg1 suggested that *L. pneumophila* O-

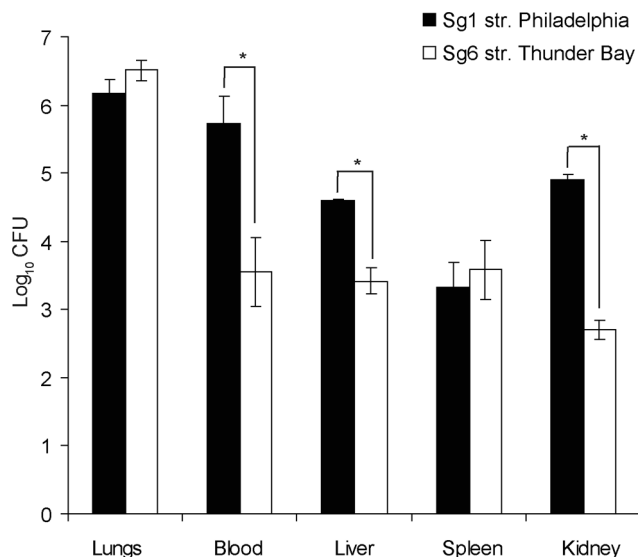

**Figure 8. Sg1 and Sg6 infections in A/J mice.** CFU counts of Sg1 and Sg6 in different organs and blood 48 h post-intratracheal inoculation. Both Sg1 and Sg6 groups consisted of 5 mice each. doi:10.1371/journal.pone.0067298.g008

antigens are structurally conserved, since legionaminic acid was identified in all serogroups, although they lacked *O*-acetylation [98]. This finding was further substantiated when *O*-antigens from different *L. pneumophila* serogroups were visualized through SDS-PAGE, and polymorphic changes compared to Sg1 were reported [99]. Our analysis indicates that while Sg6 does generate an *O*-antigen, it might lack high molecular weight species.

The structural differences in the *O*-antigen leading to the increased clinical prevalence of Sg1 may be the result of a selective pressure from the natural bacterial reservoir. In other pathogens, *O*-antigen plays a role in biofilms architecture [100] and predation by environmental amoebae [101]. Furthermore, GalE, which showed serogroup specific differences in our study, has previously been shown in *Porphyromonas gingivalis* to play a significant role both in *O*-antigen biosynthesis and biofilm production [102]. In light of these studies, we hypothesized that the *O*-antigen differences between Sg1 and Sg6 might confer an advantage for Sg1 in surviving in the environment. Comparative analysis showed that Sg6 str. Thunder Bay generates increased levels of biofilm compared to Sg1 str. Philadelphia, suggesting that the Sg6 might possess an advantage when it comes to colonizing water systems. A second strategy employed by *L. pneumophila* to survive within environmental water systems is to replicate within the amoeba host. Although our analysis was limited to one reference amoebae species model [103], Sg1 str. Philadelphia and Sg6 str. Thunder Bay were equally effective in infecting *A. castellanii*, while Sg6 str. Thunder Bay is able to replicate better within these amoebae. These findings, in combination with the conclusions drawn from our biofilm analyses, suggest that Sg1 may not possess environmental advantage upon other serogroups. Furthermore, the increased efficiency of Sg6 in replicating in amoebae should most likely permit its transmission in larger doses. This is in agreement with previous studies that have either detected similar levels of Sg1 and non-Sg1 in environmental surveys, or have reported the environmental prevalence of Sg6 over all serogroups [104,105,106,107]. More specifically, studies report that Sg6 strains are more abundant in urban water sources in Ontario [53], and are also more prevalent than Sg1 strains in environmental niches, like the Great Lakes [108]. More so, in absence of an obvious demonstrated environmental advantage for Sg1 strains, it remains unknown why certain LPS structures have been selected, but we speculate it may protect Sg1 strains from being compromised by exposure to environmental stress factors.

In several pathogens, highly decorated *O*-antigens structures provide protection against serum complement [79,109,110]. Therefore, we hypothesized that different *O*-antigen profiles of Sg1 and Sg6 might confer different levels of resistance to serum complement. Our data indicates that Sg1 str. Philadelphia is highly resistant to the alternative complement system, while both Sg1 str. Philadelphia and Sg6 str. Thunder Bay are susceptible to the classical complement pathway. Interestingly, differences in serum resistance amongst different serogroups correlated to their clinical prevalence, since Sg6 str. Thunder Bay and Sudbury, the two most predominant non-Sg1 strains in Ontario exhibited the least sensitivity to the alternative complement system. *L. pneumophila*'s susceptibility to the classical complement pathway has previously been reported [111]. Unlike the classical complement pathway where complement proteins bind the surface of bacteria opsonised with IgG/IgM [112], in the alternative pathway the spontaneous hydrolysis of  $C_3$  into  $C_{3a}$  and  $C_{3b}$  fragments triggers the activation of the complement cascade [113].  $C_3$  was previously shown to bind MOMP on *L. pneumophila* surfaces in small quantities, which may lead to the activation of the alternative complement system [114]. Perhaps, the highly deco-

rated LPS of Sg1 interferes with this interaction, and therefore, would lead to a limited binding of  $C_3$ , resulting in increased resistance to serum complement [115]. This is in agreement with previous evidence that suggests that certain strains of Sg1 might be resistant to alternative complement pathway as well [116]. A previous study also suggested that  $C_3$  cannot be detected on Sg1 surfaces using IFA in the absence of serum antibodies [117]. Similarly, we could not detect  $C_3$  on Sg1 str. Philadelphia surface, but it was present on the surface of Sg6 str. Thunder Bay. We also detected  $C_9$  on the surface Sg6 str. Thunder Bay indicating the activation of the complement cascade.

We next compared the virulence of Sg1 str. Philadelphia and Sg6 str. Thunder Bay using *in vitro* and *in vivo* experimental models. Both strains showed equal ability to infect and replicate within human lung epithelial cells. Unexpectedly, Sg6 str. Thunder Bay showed a high propensity to replicate inside macrophages compared to Sg1 str. Philadelphia. In intratracheally infected naïve mice, our findings indicate that both strains have comparable ability to colonize lungs, suggesting that complement mediated killing via the alternative pathway does not play a significant role in the immune response against *L. pneumophila* within lungs. Previously, the alternative complement cascade was shown to be limited within lungs [118]. From the lung alveoli, the bacteria may disseminate to other organ systems by crossing the lung endothelium as either free bacteria or inside macrophages [119]. Strikingly, Sg1 str. Philadelphia and Sg6 str. Thunder Bay differed in their potential to disseminate to other organs and to induce bacteraemia. In blood, where complement mediated lysis is most active, the Sg6 counts were 100-fold lower than Sg1. Significantly lower Sg6 counts were also seen in the liver and kidney. This is presumably due to the blood processing roles of these organs. The lower counts of Sg6 str. Thunder Bay in the blood suggests that after the first cycle of replication in circulating macrophages, the bacteria lyse the cells for a second round of infection, and in doing such exposes itself to the complement system. Surprisingly, no serogroup specific difference was seen in the spleen. Dissemination to kidneys and liver requires transit through blood, but both lymphatic and the circulatory system are directed to the spleen. Taking this into account, the data suggests that Sg6 and possibly *L. pneumophila* use the lymphatic system for dissemination beyond the lungs. All together our *in vitro* and *in vivo* results support that resistance to the alternative complement system may play a crucial role in the high clinical prevalence and severity of *L. pneumophila* Sg 1 infections.

The analysis of the role of *O* – antigen would be better examined by swapping the large *O* – antigen biosynthetic cluster between *L. pneumophila* Sg1 and Sg6. However, genetic tools to achieve this exchange have yet not been developed. Furthermore, the region in question has previously been shown to be an essential element in the genome of *L. pneumophila* [120], therefore limiting the likelihood of obtaining knockout mutants. Thus, the data presented in this comprehensive study combining long term molecular epidemiology, comparative genomics and pathogenicity analyses provide a unique perspective on the role of serogroups in *L. pneumophila* infections. The ability of Sg1 strains to tolerate the alternative complement cascade may allow it to disseminate to other organs via transit through blood, which is in agreement with the septicaemia and bacteraemia associated with the disease [90,91]. Because there appears to be no immediate benefit of these differences within biofilms or a natural amoebal host, future investigations explaining why this specific trait is sequestered amongst the Sg1 strains will provide critical insight into the environmental factors and hosts that shape the evolution of this important pathogen's virulence.



## Materials and Methods

### Ethics Statement

The collection of control human blood from healthy volunteers used in this study was approved by the Research Ethics Board of the Mount Sinai Hospital (Toronto, Canada). As approved by the Research Ethics Board of the Mount Sinai Hospital, a written informed consent to participate in this study was provided by all participants. The Keenan Research Centre of the Li Ka Shing Knowledge Institute, Animal Care and Use Committee reviewed and approved our study protocol for infecting and sampling mice with *Legionella pneumophila*. All work in our study was conducted adhering to the institution's guidelines for animal husbandry, and followed the guidelines Canadian council on animal care for the care and use of Laboratory Animals.

### Strains used in this Work

Legionellosis is a notifiable disease in Ontario (population 13 million persons). Since 1978, the diagnosis of *Legionella* infections has been centralized at the Ontario Public Health Laboratory. This laboratory serves as the *Legionella* reference laboratory and performs all testing for outbreak investigations and most testing of clinical specimens. Therefore, isolates analyzed in this study are representative of the non-Sg1 strains isolated in Ontario in the past 3 decades. The proportion of culture-confirmed case-patients with *L. pneumophila* infection remained stable during the period of analysis, and 34% of the isolates were non-SG1 [39]. Species and serogroups were confirmed by direct immunofluorescent antibody assay and slide-agglutination [121,122]. Isolates (n = 81) were stored at -80°C in trypticase soy broth supplemented with 5% horse blood. Eight isolates could not be resuscitated and were omitted from our analysis. With the exception of 2 Sg6 isolates collected at the same date in the same hospital, none of the isolates were epidemiologically related. *L. pneumophila* ST 39 (Sg2-3 culture confirmed cases), ST 68 (str. Sudbury (CG346); Sg6-9 culture confirmed cases), ST 187 (str. Thunder Bay (CG315); Sg6-17 culture confirmed cases), ST 378 (Sg4-2 culture confirmed cases), ST 407 (str. Mississauga (CG331); Sg6-2 culture confirmed cases), ST 465 (Sg3-5 culture confirmed cases), ST 466 (Sg8-1 culture confirmed case), ST 470 (Sg10-1 culture confirmed case), ST 471 (Sg5-1 culture confirmed case) were selected among the 73 typable isolates for further analyses. Reference clinical strain *L. pneumophila* subspecies pneumophila str. Philadelphia-1 (ST 36) was obtained from ATCC (#33152).

### Molecular Typing Schemes

The initial molecular typing of *L. pneumophila* strains was conducted using *Legionella* Sequence based Typing (SBT) scheme [43,44,123]. Molecular typing was also concurrently done through the Multiple-Locus VNTR Analysis Typing Scheme (MLVA), as formerly reported [45]. A combined MLST-MLVA dendrogram was also prepared according to a recently described method [46]. The serogroups of patient isolated strains was determined using a method previously described [39].

The Sg6 str. Thunder Bay optical map was generated according to the manufacturer's protocol (OpGen). In short, the strain was grown for four days on buffered charcoal yeast extract (BCYE) agar at 37°C with 5% CO<sub>2</sub>. Genomic DNA was extracted using the OpGen DNA extraction kit from a single colony. DNA purification via this method generated concentrated, non-sheared DNA. The DNA was allowed to relax overnight and its quality was checked via a Q-Card. The DNA was next applied to a special cover slip using a wide-bore pipette, and as a result of capillary action the DNA was stretched in channels. The DNA was stained

with a fluorescent dye and in the presence of an antifade solution, and was visualized through a laser microscope. The DNA concentration was adjusted to achieve 20–30 DNA fragments/frame, with a minimum size of 150 kB. The diluted DNA was applied to the M-card, and was treated with *NheI* for 30 min. The digested pieces of DNA were visualized via the Optical mapping array and fragment length was assigned by the onboard software (MapManager). These fragments were aligned to generate a circularized map with a minimum coverage of 65 X. Optical maps for reference strains were constructed *in silico* by providing genome sequences from public databases. The optical maps were used to construct an evolutionary tree using Mapsolver (OpGen) based on the UPGMA algorithm.

### *In vitro* Biofilm Assays

Biofilm assays were conducted according to a previously published protocol [124]. Briefly, single clones grown for 4 days on BCYE agar at 37°C and 5% CO<sub>2</sub> were used to inoculate broth cultures, which were allowed to reach an OD of 2.0 and diluted in fresh medium to give a final OD at 600 nm of 0.2. In a 96 well plate, 200 µl of this suspension was dispensed, and the plates were incubated at 37°C and 5% CO<sub>2</sub> for 2 and 4 days. Biofilms were stained with 40 µl 0.25% crystal violet in each well for 15 min and washed 3 times in deionized water, and the crystal violet stain was solubilized in 95% ethanol. Absorbance was read at 600 nm. Three independent experiments were performed using eight replicates.

### *Acanthamoeba castellanii* and U937 Derived Macrophage Inoculations

*A. castellanii* was obtained from ATCC (50739) and was cultured in peptone yeast glucose (PYG) broth (2% Peptone, 0.1% Yeast Extract, 0.1 M Glucose, 4 mM MgSO<sub>4</sub>, 0.4 M CaCl<sub>2</sub>, 0.1% HOC(COONa)(CH<sub>2</sub>COONa)<sub>2</sub> · 2H<sub>2</sub>O, 0.05 mM Fe(NH<sub>4</sub>)<sub>2</sub>(SO<sub>4</sub>)<sub>2</sub>·6H<sub>2</sub>O, 2.5 mM NaH<sub>2</sub>PO<sub>3</sub>, 2.5 mM K<sub>2</sub>HPO<sub>3</sub>, pH 6.5) as previously described [125]. U937 monocytes were obtained from ATCC (CRL-1593.2) and cultured in Roswell Park Memorial Institute (RPMI) media, supplemented with Glutamine and 10% heat inactivated fetal bovine serum. All cells were passaged 3 times before inoculation assays were carried out. U937 cells were differentiated into adherent macrophages by treatment with 1.0 × 10<sup>-3</sup> mg/ml 12-O-Tetradecanoylphorbol-13-Acetate for 48 hours. *L. pneumophila* Sg1 and Sg6 patches were grown on BCYE agar for 4 days at 37°C with 5% CO<sub>2</sub> and suspended in PBS. In a 24 well plate, 10<sup>3</sup> amoebae/macrophages were incubated with 10<sup>6</sup> bacteria for a multiplicity of infection (MOI) of 10. The incubation was carried out for 2 hours at 37°C with 5% CO<sub>2</sub>, after which free bacterial cells were removed by washing the wells 3 times with AC buffer (4 mM MgSO<sub>4</sub>, 0.4 M CaCl<sub>2</sub>, 0.1% HOC(COONa)(CH<sub>2</sub>COONa)<sub>2</sub> · 2H<sub>2</sub>O, 0.05 mM Fe(NH<sub>4</sub>)<sub>2</sub>(SO<sub>4</sub>)<sub>2</sub>·6H<sub>2</sub>O, 2.5 mM NaH<sub>2</sub>PO<sub>3</sub>, 2.5 mM K<sub>2</sub>HPO<sub>3</sub>, pH 6.5) or PBS. Next the infected cells were treated with gentamicin (100 µg/ml) for 1 hour to kill extracellular bacteria and synchronize the infections. The amoebae/macrophages were washed 3 times with AC buffer/PBS and incubated for 0, 24 and 48 hours in AC buffer/PBS at 37°C with 5% CO<sub>2</sub>. At the end of the incubation period the cells were lysed by incubating them for 5 min in ice-cold filter sterilized tap water, followed by successive passes through a 27.5 gauge needle. Serial dilutions of lysate and supernatant mixture were plated on BCYE agar and incubated for 4 days at 37°C with 5% CO<sub>2</sub> for CFU enumeration.

## NCI-H292 Lung Epithelial Cell Infections

Binding and invasion assays of NCI-H292 (ATCC, CRL-1848) cells from human lung mucocarcinoma with *L. pneumophila* str. Philadelphia and Thunder Bay were conducted as previously described [124], but with the following modifications: Bacteria were resuspended in PBS from 4 day old plates that had been incubated at 37°C with 5% CO<sub>2</sub>, and lung epithelial cells were inoculated at an MOI of 10 and were lysed by incubation in filter sterilized tap water for 5 minutes and passed through a 27.5 gauge needle.

## LPS Purification and O-antigen Analysis

LPS were purified from *L. pneumophila* str. Philadelphia and Thunder Bay as previously described [99]. In brief, bacterial suspensions (OD<sub>600</sub> 2.0) were centrifuged at 10,000×g for 5 min. The pellets were washed twice in 5 ml PBS (pH 7.2) containing 0.15 mM CaCl<sub>2</sub> and 0.5 mM MgCl<sub>2</sub>. Pellets were then resuspended in 10 ml PBS (pH 7.2) and sonicated at 4 W three times at an output setting of 0.5 (Misonix S3000) for 10 min on ice. In order to eliminate contaminating protein and nucleic acids, samples were treated with proteinase K (100 µg/mL) at 65°C for 2 hours, followed by DNaseI (20 µg/mL) and RNase (40 µg/mL) treatments at 37°C overnight. The extraction of LPS was initiated by adding an equal volume of hot (65–70°C) 90% phenol with vigorous shaking at 65–70°C for 2 hours. Suspensions were cooled on ice, transferred to 1.5 mL polypropylene tubes and centrifuged at 8500×g for 15 min. Supernatants were transferred into 15 mL conical centrifuge tubes and phenol phases were re-extracted using 300 µL dH<sub>2</sub>O. Sodium acetate at 0.5 M final concentration followed by 10 volumes of 95% ethanol were added to the extracts and samples were stored at –20°C overnight in order to precipitate LPS. Tubes were centrifuged at 2000×g, 4°C for 10 min and the pellets were resuspended in 1 ml distilled water. Extensive dialysis against distilled water at 4°C was carried out to remove any residual phenol. Purified LPS was solubilized in Laemmli buffer and boiled for 5 min to achieve a final concentration of 1 mg/ml. 20 µL/well from each sample was separated on 15% SDS gel with a 4% stacking gel under reducing condition at 100 mA for 2 hrs, using a mini-PROTEAN electrophoresis instrument (Bio-Rad Laboratories). Silver staining of the gels was performed according to the manufacturer's protocol (Bio-Rad Laboratories).

## DNA Extraction, Sequencing and Genome Assembly

The genome of *L. pneumophila* str. Thunder Bay was sequenced using a combination of Sanger, Roche-454 and Illumina sequencing platforms. All general aspects of Roche-454 library construction and sequencing were conducted according to the manufacturer's directions. Preparation of Illumina libraries and sequencing were conducted as previously described [126]. Sequencing using the Roche-454 platform generated individual reads at a minimum 19× coverage, while Illumina paired-end reads were obtained at 99× coverage. Initial genome assembly of 454 reads via the Newbler software package (Roche) generated 36 large contigs. The order of the contigs was determined via optical mapping and gaps between these contigs were closed via primer walking to generate a single molecule. A total of 440 Sanger finishing reads were produced to close gaps, while Illumina reads were used to resolve repetitive regions, and raise the quality of the finished sequence. Sequencing errors were corrected by mapping Illumina reads to the assembled *L. pneumophila* str. Thunder Bay genome using CLC Genomics Workbench (Ver 5.1.1). single 454 contig. The closed genome was annotated through the GenDB platform. All gene annotations calls were checked manually and

corrected based on greater than 95% homology with other *L. pneumophila* homologs, Pfam domains, TIGRFAM domains and SignalP predictions. Raw reads of Sg6 str. Sudbury (ST 68) and Mississauga (ST 407) were *de novo* assembled using CLC Genomics Workbench (Ver 5.1.1), and were transitively annotated against *L. pneumophila* str. Thunder Bay using the GenDB platform. The *L. pneumophila* str. Sudbury and *L. pneumophila* str. Mississauga genomes were compared with *L. pneumophila* str. Thunder Bay using GenDB (ver 5.1.1) for Single Nucleotide Polymorphism (SNP) analysis and gene content.

## Genome Annotation and Comparative Genomics

The single chromosome of *L. pneumophila* str. Thunder Bay was annotated using a modified version of the GenDB platform as previously described [127,128]. In short, ORF prediction was done in GenDB using REGANOR [129], which uses CRITICA [130] and Glimmer [131] in addition to RBSFinder [132] to make ribosomal binding site and gene predictions. Ribosomal predictions are done using tRNA-Scan-SE [133] and RNAmmer [134]. All intergenic regions were elongated with a 25 base pair overlap on each end and run through a pipeline for identification of potential frameshifts and short genes overlooked by GenDB regional prediction pipeline. Regions found with significant BLASTX [135] hits to EMBL database [136] were identified, added as new CDS regions in GenDB. All coding regions were ran through the functional annotation pipeline by running a BLAST of each region against the following databases: PFAM [137], TIGRFAM [138], KEGG [139], NCBI's non-redundant protein database, TMHMM [140], and SignalP [141].

Comparative proteomics was conducted by first comparing the *L. pneumophila* str. Thunder Bay translated genes against Sg1 core, which has previously been described [58]. Predicted proteins of *L. pneumophila* str. Thunder Bay that exhibited greater than 65% sequence identity were defined as the conserved group. These were then compared against the entire public database of known *L. pneumophila* proteins, in order to establish a list of unique proteins of *L. pneumophila* str. Thunder Bay. Furthermore, a list of unique proteins of the Sg1 core was compiled, by including proteins which showed less than 65% homology to *L. pneumophila* str. Thunder Bay predicted proteins. The pangenome of *L. pneumophila* was created using GView ver 1.6 [142].

## Serum Resistance Assays

Human blood was collected from 4 healthy volunteers and allowed to coagulate at room temperature for 30 min. The plasma was collected by centrifuging the tubes for 10 min at 1000×g and aspirating the supernatant. The plasma was analyzed via immunofluorescence assays (IFA) to confirm absence of *L. pneumophila* antibodies against Sg1 and Sg6 [143], and then was flash frozen in liquid nitrogen for storage at –80°C. Similarly, IFA was used to confirm the presence of Sg1 and Sg6 specific antibodies in patients diagnosed with Legionnaire's disease.

*L. pneumophila* str. Philadelphia and Thunder Bay were grown for 4 days on BCYE agar at 37°C with 5% CO<sub>2</sub>. The bacteria were suspended in PBS to a final concentration of 10<sup>6</sup> CFU/ml. The suspensions were diluted 10-fold in 90% non-immune human serum (NHS) and incubated at 37°C for 45 min and 90 min. In the experiments comparing serum resistance of several serogroups, a single incubation time of 60 min was selected. Similarly, experiments involving immune human serum (IHS) were carried out for 60 min. As controls, bacteria were also incubated with heat inactivated serum for the corresponding periods. Next bacteria were pelleted and washed 3 X with PBS, and CFU were determined by plating several serial dilutions on BCYE agar and

incubated as before. These CFU values were compared to the inoculums and the data is reported as % survival.

### Immuno-fluorescence Assays (IFA)

*L. pneumophila* str. Philadelphia and Thunder Bay were grown for 4 days on BCYE agar at 37°C with 5% CO<sub>2</sub>, were resuspended in 1× PBS and adjusted to OD 2.0. Bacteria were incubated in NHS for 25 min at 37°C and washed 2× with PBS. Bacterial suspensions were smeared onto glass slides and allowed to air dry. The smears were then heat fixed, followed by fixation in 4% paraformaldehyde for 15 min. Cells were blocked in 5% fetal calf serum in PBS for 1 hour at room temperature, followed by a 1 hour incubation with C<sub>3</sub>, C<sub>5</sub> and C<sub>9</sub> primary antibodies diluted (1:10) in the blocking solution (Hycult Biotech). Images were acquired using Quorum tech Canada Optigrd structure illumination system in a Leica DMI6000B stand with a with a Hamamatsu EM-1K, EMCCD camera.

### A/J Mice Model

Six to eight week old female A/J mice (Jackson Laboratories) were infected with 50 µl of 10<sup>6</sup> bacterial suspensions of either Sg1 str. Philadelphia or Sg6 str. Thunder Bay as previously described (Brieland et al., 1994). The bacterial suspensions were prepared in PBS from bacteria grown on BCYE agar plates for 4 days at 37°C with 5% CO<sub>2</sub>. The mice were infected via intra-tracheal inoculations. Forty eight hours post infection, the mice were sacrificed and organs were harvested. Homogenized organs and blood were plated on BCYE agar plates and grown for 4 days at 37°C with 5% CO<sub>2</sub>. The counts are reported as log<sub>10</sub> CFU. The experiment was conducted in accordance with the approved protocol at the research vivarium of St. Michael's hospital (Toronto, Ontario).

## References

- Fraser DW, Tsai TR, Orenstein W, Parkin WE, Beecham HJ, et al. (1977) Legionnaires' disease: description of an epidemic of pneumonia. *N Engl J Med* 297: 1189–1197.
- Newton HJ, Ang DK, van Driel IR, Hartland EL (2010) Molecular pathogenesis of infections caused by *Legionella pneumophila*. *Clin Microbiol Rev* 23: 274–298.
- Winn WC Jr (1988) Legionnaires disease: historical perspective. *Clin Microbiol Rev* 1: 60–81.
- Sanford JP (1979) Legionnaires' disease: one person's perspective. *Ann Intern Med* 90: 699–703.
- McDade JE, Shepard CC, Fraser DW, Tsai TR, Redus MA, et al. (1977) Legionnaires' disease: isolation of a bacterium and demonstration of its role in other respiratory disease. *N Engl J Med* 297: 1197–1203.
- Yu VL, Plouffe JF, Pastoris MC, Stout JE, Schousboe M, et al. (2002) Distribution of *Legionella* species and serogroups isolated by culture in patients with sporadic community-acquired legionellosis: an international collaborative survey. *J Infect Dis* 186: 127–128.
- Carratala J, Garcia-Vidal C (2010) An update on *Legionella*. *Curr Opin Infect Dis* 23: 152–157.
- Skaza AT, Beskovnik L, Storman A, Kese D, Ursic S (2012) Epidemiological investigation of a legionellosis outbreak in a Slovenian nursing home, August 2010. *Scand J Infect Dis* 44: 263–269.
- Haupt TE, Heffernan RT, Kazmierczak JJ, Nehls-Lowe H, Rheineck B, et al. (2012) An outbreak of legionnaires disease associated with a decorative water wall fountain in a hospital. *Infect Control Hosp Epidemiol* 33: 185–191.
- Silk BJ, Moore MR, Bergholdt M, Gorwitz RJ, Kozak NA, et al. (2012) Eight years of Legionnaires' disease transmission in travellers to a condominium complex in Las Vegas, Nevada. *Epidemiol Infect*: 1–10.
- Legionellosis – United States, 2000–2009. *MMWR Morb Mortal Wkly Rep* 60: 1083–1086.
- Hicks LA, Garrison LE, Nelson GE, Hampton LM (2012) Legionellosis—United States, 2000–2009. *Am J Transplant* 12: 250–253.
- Fields BS, Benson RF, Besser RE (2002) *Legionella* and Legionnaires' disease: 25 years of investigation. *Clin Microbiol Rev* 15: 506–526.
- Straus WL, Plouffe JF, File TM Jr, Lipman HB, Hackman BH, et al. (1996) Risk factors for domestic acquisition of legionnaires disease. Ohio legionnaires Disease Group. *Arch Intern Med* 156: 1685–1692.
- Stout JE, Yu VL, Yee YC, Vaccarello S, Diven W, et al. (1992) *Legionella pneumophila* in residential water supplies: environmental surveillance with clinical assessment for Legionnaires' disease. *Epidemiol Infect* 109: 49–57.
- Stout JE, Yu VL, Muraca P, Joly J, Troup N, et al. (1992) Potable water as a cause of sporadic cases of community-acquired legionnaires' disease. *N Engl J Med* 326: 151–155.
- Leoni E, Legnani PP, Bucci Sabattini MA, Righi F (2001) Prevalence of *Legionella spp.* in swimming pool environment. *Water Res* 35: 3749–3753.
- Tobin JO, Bartlett CL, Waitkins SA, Barrow GI, Macrae AD, et al. (1981) Legionnaires' disease: further evidence to implicate water storage and distribution systems as sources. *Br Med J (Clin Res Ed)* 282: 573.
- Costa J, Tiago I, da Costa MS, Verissimo A (2005) Presence and persistence of *Legionella spp.* in groundwater. *Appl Environ Microbiol* 71: 663–671.
- Rogers J, Keevil CW (1992) Immunogold and fluorescein immunolabelling of *Legionella pneumophila* within an aquatic biofilm visualized by using episcopic differential interference contrast microscopy. *Appl Environ Microbiol* 58: 2326–2330.
- Mampel J, Spirig T, Weber SS, Haagenen JA, Molin S, et al. (2006) Planktonic replication is essential for biofilm formation by *Legionella pneumophila* in a complex medium under static and dynamic flow conditions. *Appl Environ Microbiol* 72: 2885–2895.
- Berk SG, Faulkner G, Garduno E, Joy MC, Ortiz-Jimenez MA, et al. (2008) Packaging of live *Legionella pneumophila* into pellets expelled by *Tetrahymena spp.* does not require bacterial replication and depends on a Dot/Icm-mediated survival mechanism. *Appl Environ Microbiol* 74: 2187–2199.
- Molmeret M, Horn M, Wagner M, Santic M, Abu Kwaik Y (2005) Amoebae as training grounds for intracellular bacterial pathogens. *Appl Environ Microbiol* 71: 20–28.

## Supporting Information

**Figure S1 SBT typing of a population based clinical repository of *L. pneumophila*.** Phylogenetic clusters were constructed based on UPGMA analysis of SBT distribution. The large cluster and the subclusters 1 and 2 are identified in the phylogenetic tree. (PDF)

**Figure S2 MLVA typing of a population based clinical repository of *L. pneumophila*.** Phylogenetic clusters were constructed based on UPGMA analysis of MLVA based distribution. The large cluster and the subclusters 1 and 2 are identified in the phylogenetic tree. (PDF)

**Table S1 General features of the sequenced Sg6 strains.** (PDF)

**Table S2 Comparative proteomics analysis between Sg1 core genes and Sg6 str. Thunder Bay.** Proteins that share less than 65% sequence homology and 75% coverage were defined as divergent. HP identifies hypothetical proteins. (DOC)

**Table S3 Genes that define the non-Sg1 core based on comparisons of Sg6 str. Thunder Bay and Sg12 str. 570-CO-H.** (XLS)

**Table S4 Comparison of non-Sg1 core with the Sg1 core.** (XLS)

## Author Contributions

Conceived and designed the experiments: MAK CG. Performed the experiments: MAK AP DA MAN CD PT HA NT CP CG. Analyzed the data: MAK NK AP DA CCDS DEL CP GVD MT AWE CG. Contributed reagents/materials/analysis tools: CCDS DEL CP GVD MT AWE CG. Wrote the paper: MAK NK AWE CG.

24. Rowbotham TJ (1980) Preliminary report on the pathogenicity of *Legionella pneumophila* for freshwater and soil amoebae. *J Clin Pathol* 33: 1179–1183.
25. Abu Kwaik Y, Gao LY, Stone BJ, Venkataraman C, Harb OS (1998) Invasion of protozoa by *Legionella pneumophila* and its role in bacterial ecology and pathogenesis. *Appl Environ Microbiol* 64: 3127–3133.
26. Berk SG, Ting RS, Turner GW, Ashburn RJ (1998) Production of respirable vesicles containing live *Legionella pneumophila* cells by two *Acanthamoeba* spp. *Appl Environ Microbiol* 64: 279–286.
27. Brieland JK, Fantone JC, Remick DG, LeGendre M, McClain M, et al. (1997) The role of *Legionella pneumophila*-infected *Hartmannella vermiformis* as an infectious particle in a murine model of Legionnaire's disease. *Infect Immun* 65: 5330–5333.
28. Shi C, Pamer EG (2011) Monocyte recruitment during infection and inflammation. *Nat Rev Immunol* 11: 762–774.
29. Horwitz MA, Silverstein SC (1980) Legionnaires' disease bacterium (*Legionella pneumophila*) multiples intracellularly in human monocytes. *J Clin Invest* 66: 441–450.
30. Horwitz MA (1983) The Legionnaires' disease bacterium (*Legionella pneumophila*) inhibits phagosome-lysosome fusion in human monocytes. *J Exp Med* 158: 2108–2126.
31. Kagan JC, Roy CR (2002) *Legionella* phagosomes intercept vesicular traffic from endoplasmic reticulum exit sites. *Nat Cell Biol* 4: 945–954.
32. Vogel JP, Andrews HL, Wong SK, Isberg RR (1998) Conjugative transfer by the virulence system of *Legionella pneumophila*. *Science* 279: 873–876.
33. Segal G, Purcell M, Shuman HA (1998) Host cell killing and bacterial conjugation require overlapping sets of genes within a 22-kb region of the *Legionella pneumophila* genome. *Proc Natl Acad Sci U S A* 95: 1669–1674.
34. Helbig JH, Luck PC, Witzleb W (1994) Serogroup-specific and serogroup-cross-reactive epitopes of *Legionella pneumophila*. *Zentralbl Bakteriol* 281: 16–23.
35. Luck PC, Helbig JH, Ehret W, Ott M (1995) Isolation of a *Legionella pneumophila* strain serologically distinguishable from all known serogroups. *Zentralbl Bakteriol* 282: 35–39.
36. Olsen CW, Elverdal P, Jorgensen CS, Uldum SA (2009) Comparison of the sensitivity of the *Legionella* urinary antigen EIA kits from Binax and Biotest with urine from patients with infections caused by less common serogroups and subgroups of *Legionella*. *Eur J Clin Microbiol Infect Dis* 28: 817–820.
37. Helbig JH, Uldum SA, Luck PC, Harrison TG (2001) Detection of *Legionella pneumophila* antigen in urine samples by the BinaxNOW immunochromatographic assay and comparison with both Binax *Legionella* Urinary Enzyme Immunoassay (EIA) and Biotest *Legionella* Urin Antigen EIA. *J Med Microbiol* 50: 509–516.
38. Svarrer CW, Luck C, Elverdal PL, Uldum SA (2012) Immunochromatographic kits Xpect *Legionella* and BinaxNOW *Legionella* for detection of *Legionella pneumophila* urinary antigen have low sensitivities for the diagnosis of Legionnaires' disease. *J Med Microbiol* 61: 213–217.
39. Ng V, Tang P, Jamieson F, Guyard C, Low DE, et al. (2009) Laboratory-based evaluation of legionellosis epidemiology in Ontario, Canada, 1978 to 2006. *BMC Infect Dis* 9: 68.
40. Helbig JH, Bernander S, Castellani Pastoris M, Etienne J, Gaia V, et al. (2002) Pan-European study on culture-proven Legionnaires' disease: distribution of *Legionella pneumophila* serogroups and monoclonal subgroups. *Eur J Clin Microbiol Infect Dis* 21: 710–716.
41. Doleans A, Aurell H, Reyrolle M, Lina G, Frency J, et al. (2004) Clinical and environmental distributions of *Legionella* strains in France are different. *J Clin Microbiol* 42: 458–460.
42. Cazalet C, Jarraud S, Ghavi-Helm Y, Kunst F, Glaser P, et al. (2008) Multigenome analysis identifies a worldwide distributed epidemic *Legionella pneumophila* clone that emerged within a highly diverse species. *Genome Res* 18: 431–441.
43. Gaia V, Fry NK, Afshar B, Luck PC, Meunier H, et al. (2005) Consensus sequence-based scheme for epidemiological typing of clinical and environmental isolates of *Legionella pneumophila*. *J Clin Microbiol* 43: 2047–2052.
44. Ratzow S, Gaia V, Helbig JH, Fry NK, Luck PC (2007) Addition of *neuA*, the gene encoding N-acetylneuraminase cytidyl transferase, increases the discriminatory ability of the consensus sequence-based scheme for typing *Legionella pneumophila* serogroup 1 strains. *J Clin Microbiol* 45: 1965–1968.
45. Visca P, D'Arezzo S, Ramiase F, Gelfand Y, Benson G, et al. (2011) Investigation of the population structure of *Legionella pneumophila* by analysis of tandem repeat copy number and internal sequence variation. *Microbiology* 157: 2582–2594.
46. Sobral D, Le Cann P, Gerard A, Jarraud S, Lebeau B, et al. (2011) High-throughput typing method to identify a non-outbreak-involved *Legionella pneumophila* strain colonizing the entire water supply system in the town of Rennes, France. *Appl Environ Microbiol* 77: 6899–6907.
47. Giongo A, Tyler HL, Zipperer UN, Triplett EW (2010) Two genome sequences of the same bacterial strain, *Gluconacetobacter diazotrophicus* PAI 5, suggest a new standard in genome sequence submission. *Stand Genomic Sci* 2: 309–317.
48. Latreille P, Norton S, Goldman BS, Henkhaus J, Miller N, et al. (2007) Optical mapping as a routine tool for bacterial genome sequence finishing. *BMC Genomics* 8: 321.
49. Ramirez MS, Adams MD, Bonomo RA, Centron D, Tolmasky ME (2011) Genomic analysis of *Acinetobacter baumannii* A118 by comparison of optical maps: identification of structures related to its susceptibility phenotype. *Antimicrob Agents Chemother* 55: 1520–1526.
50. Shukla SK, Kislow J, Briska A, Henkhaus J, Dykes C (2009) Optical mapping reveals a large genetic inversion between two methicillin-resistant *Staphylococcus aureus* strains. *J Bacteriol* 191: 5717–5723.
51. Lau HY, Ashbolt NJ (2009) The role of biofilms and protozoa in *Legionella* pathogenesis: implications for drinking water. *J Appl Microbiol* 107: 368–378.
52. Wingender J, Flemming HC (2011) Biofilms in drinking water and their role as reservoir for pathogens. *Int J Hyg Environ Health* 214: 417–423.
53. Dutka BJ, Walsh K, Ewan P, El-Shaarawi A, Tobin RS (1984) Incidence of *Legionella* organisms in selected Ontario (Canada) cities. *Sci Total Environ* 39: 237–249.
54. Barker J, Brown MR (1994) Trojan horses of the microbial world: protozoa and the survival of bacterial pathogens in the environment. *Microbiology* 140 (Pt 6): 1253–1259.
55. Philippe C, Blech MF, Hartemann P (2006) Intra-amoebal development of *Legionella pneumophila* and the potential role of amoebae in the transmission of Legionnaires' disease. *Med Mal Infect* 36: 196–200.
56. Jules M, Buchrieser C (2007) *Legionella pneumophila* adaptation to intracellular life and the host response: clues from genomics and transcriptomics. *FEBS Lett* 581: 2829–2838.
57. Arakawa K, Tomita M (2007) The GC skew index: a measure of genomic compositional asymmetry and the degree of replicational selection. *Evol Bioinform Online* 3: 159–168.
58. D'Auria G, Jimenez-Hernandez N, Peris-Bondia F, Moya A, Latorre A (2010) *Legionella pneumophila* pangenome reveals strain-specific virulence factors. *BMC Genomics* 11: 181.
59. Merault N, Rusniok C, Jarraud S, Gomez-Valero L, Cazalet C, et al. (2011) Specific real-time PCR for simultaneous detection and identification of *Legionella pneumophila* serogroup 1 in water and clinical samples. *Appl Environ Microbiol* 77: 1708–1717.
60. Gillespie JJ, Ammerman NC, Dreher-Lesnick SM, Rahman MS, Worley MJ, et al. (2009) An anomalous type IV secretion system in *Rickettsia* is evolutionarily conserved. *PLoS One* 4: e4833.
61. Sexton JA, Vogel JP (2002) Type IVB secretion by intracellular pathogens. *Traffic* 3: 178–185.
62. Christie PJ, Vogel JP (2000) Bacterial type IV secretion: conjugation systems adapted to deliver effector molecules to host cells. *Trends Microbiol* 8: 354–360.
63. Segal G, Russo JJ, Shuman HA (1999) Relationships between a new type IV secretion system and the icm/dot virulence system of *Legionella pneumophila*. *Mol Microbiol* 34: 799–809.
64. Land AD, Winkler ME (2011) The requirement for pneumococcal MreC and MreD is relieved by inactivation of the gene encoding PBP1a. *J Bacteriol* 193: 4166–4179.
65. Wachi M, Doi M, Okada Y, Matsushashi M (1989) New *mre* genes *mreC* and *mreD*, responsible for formation of the rod shape of *Escherichia coli* cells. *J Bacteriol* 171: 6511–6516.
66. Luneberg E, Zetzmann N, Alber D, Knirel YA, Kooistra O, et al. (2000) Cloning and functional characterization of a 30 kb gene locus required for lipopolysaccharide biosynthesis in *Legionella pneumophila*. *Int J Med Microbiol* 290: 37–49.
67. Greenfield LK, Whitfield C (2012) Synthesis of lipopolysaccharide O-antigens by ABC transporter-dependent pathways. *Carbohydr Res*.
68. Whitfield C (2006) Biosynthesis and assembly of capsular polysaccharides in *Escherichia coli*. *Annu Rev Biochem* 75: 39–68.
69. Trent MS (2004) Biosynthesis, transport, and modification of lipid A. *Biochem Cell Biol* 82: 71–86.
70. Rangarajan ES, Proteau A, Cui Q, Logan SM, Potetinova Z, et al. (2009) Structural and functional analysis of *Campylobacter jejuni* PseG: a udp-sugar hydrolase from the pseudaminic acid biosynthetic pathway. *J Biol Chem* 284: 20989–21000.
71. Raymond CK, Sims EH, Kas A, Spencer DH, Kutyavin TV, et al. (2002) Genetic variation at the O-antigen biosynthetic locus in *Pseudomonas aeruginosa*. *J Bacteriol* 184: 3614–3622.
72. Amaro F, Gilbert JA, Owens S, Trimble W, Shuman HA (2012) Whole-genome sequence of the human pathogen *Legionella pneumophila* serogroup 12 strain 570-CO-H. *J Bacteriol* 194: 1613–1614.
73. Schroeder GN, Petty NK, Mousnier A, Harding CR, Vogrin AJ, et al. (2010) *Legionella pneumophila* strain 130b possesses a unique combination of type IV secretion systems and novel Dot/Icm secretion system effector proteins. *J Bacteriol* 192: 6001–6016.
74. Tsai CM, Frasch CE (1982) A sensitive silver stain for detecting lipopolysaccharides in polyacrylamide gels. *Anal Biochem* 119: 115–119.
75. Ciesielski CA, Blaser MJ, Wang WL (1986) Serogroup specificity of *Legionella pneumophila* is related to lipopolysaccharide characteristics. *Infect Immun* 51: 397–404.
76. Thomason BM, Bibb WF (1984) Use of absorbed antisera for demonstration of antigenic variation among strains of *Legionella pneumophila* serogroup 1. *J Clin Microbiol* 19: 794–797.
77. Joly JR, McKinney RM, Tobin JO, Bibb WF, Watkins ID, et al. (1986) Development of a standardized subgrouping scheme for *Legionella pneumophila* serogroup 1 using monoclonal antibodies. *J Clin Microbiol* 23: 768–771.

78. Pluschke G, Maiden J, Achtman M, Levine RP (1983) Role of the capsule and the O antigen in resistance of O18:K1 *Escherichia coli* to complement-mediated killing. Infect Immun 42: 907–913.
79. Grossman N, Schmetz MA, Foulds J, Klima EN, Jimenez-Lucho VE, et al. (1987) Lipopolysaccharide size and distribution determine serum resistance in *Salmonella montevideo*. J Bacteriol 169: 856–863.
80. Goebel EM, Wolfe DN, Elder K, Stibitz S, Harvill ET (2008) O antigen protects *Bordetella parapertussis* from complement. Infect Immun 76: 1774–1780.
81. Schneider MC, Exley RM, Ram S, Sim RB, Tang CM (2007) Interactions between *Neisseria meningitidis* and the complement system. Trends Microbiol 15: 233–240.
82. Vogel U, Weinberger A, Frank R, Muller A, Kohl J, et al. (1997) Complement factor C3 deposition and serum resistance in isogenic capsule and lipooligosaccharide sialic acid mutants of serogroup B *Neisseria meningitidis*. Infect Immun 65: 4022–4029.
83. Peitsch MC, Tschopp J (1991) Assembly of macromolecular pores by immune defense systems. Curr Opin Cell Biol 3: 710–716.
84. Marcus RL, Shin HS, Mayer MM (1971) An alternate complement pathway: C-3 cleaving activity, not due to C4,2a, on endotoxic lipopolysaccharide after treatment with guinea pig serum; relation to properdin. Proc Natl Acad Sci U S A 68: 1351–1354.
85. Daha MR (2010) Role of complement in innate immunity and infections. Crit Rev Immunol 30: 47–52.
86. Lachmann PJ, Thompson RA (1970) Reactive lysis: the complement-mediated lysis of unsensitized cells. II. The characterization of activated reactor as C56 and the participation of C8 and C9. J Exp Med 131: 643–657.
87. Rossi V, Wang Y, Esser AF (2010) Topology of the membrane-bound form of complement protein C9 probed by glycosylation mapping, anti-peptide antibody binding, and disulfide modification. Mol Immunol 47: 1553–1560.
88. Brieland J, Freeman P, Kunkel R, Chrisp C, Hurley M, et al. (1994) Replicative *Legionella pneumophila* lung infection in intratracheally inoculated A/J mice. A murine model of human Legionnaires' disease. Am J Pathol 145: 1537–1546.
89. Ogawa M, Yoshida S, Mizuguchi Y (1994) 2-Deoxy-D-glucose inhibits intracellular multiplication and promotes intracellular killing of *Legionella pneumophila* in A/J mouse macrophages. Infect Immun 62: 266–270.
90. Takayanagi N, Ishiguro T, Matsushita A, Yoshii Y, Kagiyama N, et al. (2009) Severe complications and their outcomes in 65 patients with *Legionella* pneumonia. Nihon Kokyuki Gakkai Zasshi 47: 558–568.
91. Demello D, Kierol-Andrews L, Scalise PJ (2007) Severe sepsis and acute respiratory distress syndrome from community-acquired *Legionella* pneumonia: case report. Am J Crit Care 16: 320, 317.
92. Pan YJ, Lin TL, Hsu CR, Wang JT (2011) Use of a *Dictyostelium* model for isolation of genetic loci associated with phagocytosis and virulence in *Klebsiella pneumoniae*. Infect Immun 79: 997–1006.
93. Touchon M, Hoede C, Tenaillon O, Barbe V, Baeriswyl S, et al. (2009) Organised genome dynamics in the *Escherichia coli* species results in highly diverse adaptive paths. PLoS Genet 5: e1000344.
94. Canals R, Jimenez N, Vilches S, Regue M, Merino S, et al. (2007) Role of Gne and GalE in the virulence of *Aeromonas hydrophila* serotype O34. J Bacteriol 189: 540–550.
95. Kooistra O, Luneberg E, Lindner B, Knirel YA, Frosch M, et al. (2001) Complex O-acetylation in *Legionella pneumophila* serogroup 1 lipopolysaccharide. Evidence for two genes involved in 8-O-acetylation of legionaminic acid. Biochemistry 40: 7630–7640.
96. Luck PC, Freier T, Steudel C, Knirel YA, Luneberg E, et al. (2001) A point mutation in the active site of *Legionella pneumophila* O-acetyltransferase results in modified lipopolysaccharide but does not influence virulence. Int J Med Microbiol 291: 345–352.
97. Zahring U, Knirel YA, Lindner B, Helbig JH, Sonesson A, et al. (1995) The lipopolysaccharide of *Legionella pneumophila* serogroup 1 (strain Philadelphia 1): chemical structure and biological significance. Prog Clin Biol Res 392: 113–139.
98. Knirel YA, Senchenkova SN, Kocharova NA, Shashkov AS, Helbig JH, et al. (2001) Identification of a homopolymer of 5-acetamidino-7-acetamido-3,5,7,9-tetra-deoxy-D-glycero-D-talo-nonosulonic acid in the lipopolysaccharides of *Legionella pneumophila* Non-1 serogroups. Biochemistry (Mosc) 66: 1035–1041.
99. Otten S, Iyer S, Johnson W, Montgomery R (1986) Serospecific antigens of *Legionella pneumophila*. J Bacteriol 167: 893–904.
100. Lau PC, Lindhout T, Beveridge TJ, Dutcher JR, Lam JS (2009) Differential lipopolysaccharide core capping leads to quantitative and correlated modifications of mechanical and structural properties in *Pseudomonas aeruginosa* biofilms. J Bacteriol 191: 6618–6631.
101. Wildschutte H, Wolfe DM, Tamewitz A, Lawrence JG (2004) Protozoan predation, diversifying selection, and the evolution of antigenic diversity in *Salmonella*. Proc Natl Acad Sci U S A 101: 10644–10649.
102. Nakao R, Senpuku H, Watanabe H (2006) *Porphyromonas gingivalis* galE is involved in lipopolysaccharide O-antigen synthesis and biofilm formation. Infect Immun 74: 6145–6153.
103. Holden EP, Winkler HH, Wood DO, Leinbach ED (1984) Intracellular growth of *Legionella pneumophila* within *Acanthamoeba castellanii* Neff. Infect Immun 45: 18–24.
104. Napoli C, Fasano F, Iatta R, Barbuti G, Cuna T, et al. (2010) *Legionella spp.* and legionellosis in southeastern Italy: disease epidemiology and environmental surveillance in community and health care facilities. BMC Public Health 10: 660.
105. Boccia S, Laurenti P, Borella P, Moscato U, Capalbo G, et al. (2006) Prospective 3-year surveillance for nosocomial and environmental *Legionella pneumophila*: implications for infection control. Infect Control Hosp Epidemiol 27: 459–465.
106. Harrison TG, Afshar B, Doshi N, Fry NK, Lee JV (2009) Distribution of *Legionella pneumophila* serogroups, monoclonal antibody subgroups and DNA sequence types in recent clinical and environmental isolates from England and Wales (2000–2008). Eur J Clin Microbiol Infect Dis 28: 781–791.
107. Mekhour M, Ben-Driss EK, Cohen N (2012) Prevalence of *Legionella pneumophila* in production networks and distribution of domestic hot water in Morocco. World Environment 2: 11–15.
108. Ewan BJDap (1983) First isolation of *Legionella pneumophila* from the Canadian Great Lakes. Journal of Great Lakes Research 9: 430–432.
109. McCallum KL, Schoenhals G, Laakso D, Clarke B, Whitfield C (1989) A high-molecular-weight fraction of smooth lipopolysaccharide in *Klebsiella* serotype O1:K20 contains a unique O-antigen epitope and determines resistance to nonspecific serum killing. Infect Immun 57: 3816–3822.
110. Williams P, Lambert PA, Brown MR, Jones RJ (1983) The role of the O and K antigens in determining the resistance of *Klebsiella aerogenes* to serum killing and phagocytosis. J Gen Microbiol 129: 2181–2191.
111. Mintz CS, Schultz DR, Arnold PI, Johnson W (1992) *Legionella pneumophila* lipopolysaccharide activates the classical complement pathway. Infect Immun 60: 2769–2776.
112. Kojouharova M, Reid K, Gadjeva M (2010) New insights into the molecular mechanisms of classical complement activation. Mol Immunol 47: 2154–2160.
113. Conrad DH, Carlo JR, Ruddy S (1978) Interaction of beta1H globulin with cell-bound C3b: quantitative analysis of binding and influence of alternative pathway components on binding. J Exp Med 147: 1792–1805.
114. Bellinger-Kawahara C, Horwitz MA (1990) Complement component C3 fixes selectively to the major outer membrane protein (MOMP) of *Legionella pneumophila* and mediates phagocytosis of liposome-MOMP complexes by human monocytes. J Exp Med 172: 1201–1210.
115. Ohno A, Isii Y, Tateda K, Matumoto T, Miyazaki S, et al. (1995) Role of LPS length in clearance rate of bacteria from the bloodstream in mice. Microbiology 141 (Pt 10): 2749–2756.
116. Plouffe JF, Para MF, Fuller KA (1985) Serum bactericidal activity against *Legionella pneumophila*. J Clin Microbiol 22: 863–864.
117. Horwitz MA, Silverstein SC (1981) Interaction of the legionnaires' disease bacterium (*Legionella pneumophila*) with human phagocytes. II. Antibody promotes binding of *L. pneumophila* to monocytes but does not inhibit intracellular multiplication. J Exp Med 153: 398–406.
118. Ferguson JS, Weis JJ, Martin JL, Schlesinger LS (2004) Complement protein C3 binding to *Mycobacterium tuberculosis* is initiated by the classical pathway in human bronchoalveolar lavage fluid. Infect Immun 72: 2564–2573.
119. Chiaraviglio L, Brown DA, Kirby JE (2008) Infection of cultured human endothelial cells by *Legionella pneumophila*. PLoS One 3: e2012.
120. O'Connor TJ, Adepoju Y, Boyd D, Isberg RR (2011) Minimization of the *Legionella pneumophila* genome reveals chromosomal regions involved in host range expansion. Proc Natl Acad Sci U S A 108: 14733–14740.
121. Cherry WB, Pittman B, Harris PP, Hebert GA, Thomson BM, et al. (1978) Detection of Legionnaires disease bacteria by direct immunofluorescent staining. J Clin Microbiol 8: 329–338.
122. Thacker WL, Wilkinson HW, Benson RF (1983) Comparison of slide agglutination test and direct immunofluorescence assay for identification of *Legionella* isolates. J Clin Microbiol 18: 1113–1118.
123. Tijet N, Tang P, Romilowych M, Duncan C, Ng V, et al. (2010) New endemic *Legionella pneumophila* serogroup 1 clones, Ontario, Canada. Emerg Infect Dis 16: 447–454.
124. Duncan C, Prashar A, So J, Tang P, Low DE, et al. (2011) Lcl of *Legionella pneumophila* is an immunogenic GAG binding adhesin that promotes interactions with lung epithelial cells and plays a crucial role in biofilm formation. Infect Immun 79: 2168–2181.
125. Lebeau I, Lammertyn E, De Buck E, Maes L, Geukens N, et al. (2004) Novel transcriptional regulators of *Legionella pneumophila* that affect replication in *Acanthamoeba castellanii*. Arch Microbiol 181: 362–370.
126. Ensminger AW, Yassin Y, Miron A, Isberg RR (2012) Experimental Evolution of *Legionella pneumophila* in Mouse Macrophages Leads to Strains with Altered Determinants of Environmental Survival. PLoS Pathog 8: e1002731.
127. Meyer F, Goemann A, McHardy AC, Bartelds D, Bekel T, et al. (2003) GenDB—an open source genome annotation system for prokaryote genomes. Nucleic Acids Res 31: 2187–2195.
128. Reimer AR, Van Domselaar G, Stroika S, Walker M, Kent H, et al. (2011) Comparative genomics of *Vibrio cholerae* from Haiti, Asia, and Africa. Emerg Infect Dis 17: 2113–2121.
129. Linke B, McHardy AC, Neuweger H, Krause L, Meyer F (2006) REGANOR: a gene prediction server for prokaryotic genomes and a database of high quality gene predictions for prokaryotes. Appl Bioinformatics 5: 193–198.
130. Badger JH, Olsen GJ (1999) CRITICA: coding region identification tool invoking comparative analysis. Mol Biol Evol 16: 512–524.
131. Delcher AL, Bratke KA, Powers EC, Salzberg SL (2007) Identifying bacterial genes and endosymbiont DNA with Glimmer. Bioinformatics 23: 673–679.



132. Suzek BE, Ermolaeva MD, Schreiber M, Salzberg SL (2001) A probabilistic method for identifying start codons in bacterial genomes. *Bioinformatics* 17: 1123–1130.
133. Schattner P, Brooks AN, Lowe TM (2005) The tRNAscan-SE, snoscan and snoGPS web servers for the detection of tRNAs and snoRNAs. *Nucleic Acids Res* 33: W686–689.
134. Lagesen K, Hallin P, Rodland EA, Staerfeldt HH, Rognes T, et al. (2007) RNAmmer: consistent and rapid annotation of ribosomal RNA genes. *Nucleic Acids Res* 35: 3100–3108.
135. Altschul SF, Madden TL, Schaffer AA, Zhang J, Zhang Z, et al. (1997) Gapped BLAST and PSI-BLAST: a new generation of protein database search programs. *Nucleic Acids Res* 25: 3389–3402.
136. Rice P, Longden I, Bleasby A (2000) EMBOSS: the European Molecular Biology Open Software Suite. *Trends Genet* 16: 276–277.
137. Finn RD, Mistry J, Tate J, Coggill P, Heger A, et al. (2010) The Pfam protein families database. *Nucleic Acids Res* 38: D211–222.
138. Haft DH, Selengut JD, White O (2003) The TIGRFAMs database of protein families. *Nucleic Acids Res* 31: 371–373.
139. Kanehisa M, Goto S, Sato Y, Furumichi M, Tanabe M (2012) KEGG for integration and interpretation of large-scale molecular data sets. *Nucleic Acids Res* 40: D109–114.
140. Sonnhammer EL, von Heijne G, Krogh A (1998) A hidden Markov model for predicting transmembrane helices in protein sequences. *Proc Int Conf Intell Syst Mol Biol* 6: 175–182.
141. Nielsen H, Brunak S, von Heijne G (1999) Machine learning approaches for the prediction of signal peptides and other protein sorting signals. *Protein Eng* 12: 3–9.
142. Petkau A, Stuart-Edwards M, Stothard P, Van Domselaar G (2010) Interactive microbial genome visualization with GView. *Bioinformatics* 26: 3125–3126.
143. McKinney RM, Thomason BM, Harris PP, Thacker L, Lewallen KR, et al. (1979) Recognition of a new serogroup of Legionnaires disease bacterium. *J Clin Microbiol* 9: 103–107.
