# Supplementary material for: Comparative Genomics Reveal That Host-Innate Immune Responses Influence the Clinical Prevalence of Legionella pneumophila Serogroups
Source: PLoS One. 2013 Jun 27;8(6):e67298. doi: 10.1371/journal.pone.0067298 (PMC3694923; doi:10.1371/journal.pone.0067298)
Supplement: Figure S2 — MLVA typing of a population based clinical repository of L. pneumophila . Phylogenetic clusters were constructed based on UPGMA analysis of MLVA based distribution. The large cluster and the subclusters 1 and 2 are identified in the phylogenetic tree. (PDF) [file pone.0067298.s002.pdf]

| MLVA Markers |      |      |      |      |      |      |      |      |       | Molecular types |                   | Serogroups | Subcluster 1 | Subcluster 2 | Large cluster |
|--------------|------|------|------|------|------|------|------|------|-------|-----------------|-------------------|------------|--------------|--------------|---------------|
| Sg13         | Sg35 | Sg33 | Sg34 | Sg31 | Sg17 | Sg19 | Sg01 | Sg03 | MLVA  | ST              |                   |            |              |              |               |
| 3.0          | 8.0  | 2.5  | 1.0  | 16.0 |      |      |      | 8.0  | 8.0   | is310           | 471               | Sg 5       |              |              |               |
| 3.0          | 8.0  | 2.5  | 1.0  |      | 2.0  | 4.0  | 8.0  | 8.0  | is386 | .               |                   | Sg5        |              |              |               |
| 3.0          | 11.0 | 1.0  | 1.0  | 16.0 |      | 4.0  | 7.5  | 8.0  | is332 | .               |                   | Sg4        |              |              |               |
| 11.0         | 3.0  | 1.0  | 1.0  | 17.0 | 2.0  | 4.0  | 8.0  | 8.0  | is316 | 114             |                   | Sg6        |              |              |               |
| 11.0         | 3.0  | 1.0  | 1.0  | 17.0 | 2.0  | 4.0  | 8.0  | 8.0  | is330 | 621             |                   | Sg5        |              |              |               |
| 11.0         | 3.0  | 1.0  | 1.0  | 17.0 | 2.0  | 4.0  | 8.0  | 8.0  | is359 | 114             |                   | Sg6        |              |              |               |
| 11.0         | 3.0  | 1.0  | 1.0  | 17.0 | 2.0  | 4.0  | 8.0  | 8.0  | is376 | .               |                   | Sg5        |              |              |               |
| 9.0          | 3.0  | 1.0  | 1.0  | 17.0 | 2.0  | 4.0  | 8.0  | 8.0  | is321 | 187             |                   | Sg6        |              |              |               |
| 10.0         | 3.0  | 1.0  | 1.0  | 17.0 | 2.0  |      | 8.0  | 8.0  | is339 | 187             |                   | Sg6        |              |              |               |
| 10.0         | 3.0  | 1.0  | 1.0  |      | 2.0  | 4.0  | 8.0  | 8.0  | is388 | .               |                   | Sg8        |              |              |               |
| 14.0         | 3.0  | 1.0  | 1.0  | 17.0 | 1.5  | 4.0  | 8.0  | 8.0  | is365 | 187             |                   | Sg6        |              |              |               |
| 14.0         | 3.0  | 1.0  | 1.0  | 17.0 | 1.5  | 4.0  | 8.0  | 8.0  | is372 | 187             |                   | Sg6        |              |              |               |
| 11.0         | 3.0  | 1.0  | 1.0  | 17.0 | 1.5  |      | 8.0  | 8.0  | is315 | 187             | Sg6 (THUNDER BAY) |            |              |              |               |
| 11.0         | 3.0  | 1.0  | 1.0  | 17.0 | 1.5  | 4.0  | 8.0  | 8.0  | is317 | 68              | Sg6 (SUDBURY)     |            |              |              |               |
| 11.0         | 3.0  | 1.0  | 1.0  | 17.0 | 1.5  | 4.0  | 8.0  | 8.0  | is324 | 68              |                   | Sg6        |              |              |               |
| 11.0         | 3.0  | 1.0  | 1.0  | 17.0 | 1.5  | 4.0  | 8.0  | 8.0  | is333 | 469             |                   | Sg10       |              |              |               |
| 11.0         | 3.0  | 1.0  | 1.0  | 17.0 | 1.5  | 4.0  | 8.0  | 8.0  | is337 | 68              |                   | Sg6        |              |              |               |
| 11.0         | 3.0  | 1.0  | 1.0  | 17.0 | 1.5  | 4.0  | 8.0  | 8.0  | is344 | 187             |                   | Sg6        |              |              |               |
| 11.0         | 3.0  | 1.0  | 1.0  | 17.0 | 1.5  | 4.0  | 8.0  |      | is345 | 468             |                   | Sg8        |              |              |               |
| 11.0         | 3.0  | 1.0  | 1.0  | 17.0 | 1.5  | 4.0  | 8.0  | 8.0  | is346 | 68              |                   | Sg6        |              |              |               |
| 11.0         | 3.0  | 1.0  | 1.0  | 17.0 | 1.5  | 4.0  | 8.0  | 8.0  | is347 | 68              |                   | Sg6        |              |              |               |
| 11.0         | 3.0  | 1.0  | 1.0  | 17.0 | 1.5  | 4.0  | 8.0  | 8.0  | is348 | 68              |                   | Sg6        |              |              |               |
| 11.0         | 3.0  | 1.0  | 1.0  | 17.0 | 1.5  | 4.0  | 8.0  | 8.0  | is349 | 378             |                   | Sg4        |              |              |               |
| 11.0         | 3.0  | 1.0  | 1.0  | 17.0 | 1.5  | 4.0  | 8.0  | 8.0  | is350 | 187             |                   | Sg6        |              |              |               |
| 11.0         | 3.0  | 1.0  | 1.0  | 17.0 | 1.5  | 4.0  | 8.0  | 8.0  | is352 | 187             |                   | Sg6        |              |              |               |
| 11.0         | 3.0  | 1.0  | 1.0  | 17.0 | 1.5  |      | 8.0  | 8.0  | is363 | 68              |                   | Sg6        |              |              |               |
| 11.0         | 3.0  | 1.0  | 1.0  | 17.0 | 1.5  | 4.0  | 8.0  | 8.0  | is364 | 68              |                   | Sg6        |              |              |               |
| 11.0         | 3.0  | 1.0  | 1.0  | 17.0 | 1.5  | 4.0  | 8.0  | 8.0  | is366 | 187             |                   | Sg8        |              |              |               |
| 11.0         | 3.0  | 1.0  | 1.0  | 17.0 | 1.5  | 4.0  | 8.0  | 8.0  | is367 | .               |                   | Sg8        |              |              |               |
| 11.0         | 3.0  | 1.0  | 1.0  | 17.0 | 1.5  | 4.0  | 8.0  | 8.0  | is368 | .               |                   | Sg4-8      |              |              |               |
| 11.0         | 3.0  | 1.0  | 1.0  | 17.0 | 1.5  | 4.0  | 8.0  | 8.0  | is374 | 68              |                   | Sg6        |              |              |               |
| 11.0         | 3.0  | 1.0  | 1.0  | 17.0 | 1.5  | 4.0  | 8.0  | 8.0  | is377 | 378             |                   | Sg4        |              |              |               |
| 10.0         | 3.0  | 1.0  | 1.0  | 17.0 | 1.5  | 4.0  | 8.0  | 8.0  | is309 | 242             |                   | Sg6        |              |              |               |
| 10.0         | 3.0  | 1.0  | 1.0  | 17.0 | 1.5  | 4.0  | 8.0  | 8.0  | is341 | 187             |                   | Sg6        |              |              |               |
| 10.0         | 3.0  | 1.0  | 1.0  | 17.0 | 1.5  | 4.0  | 8.0  | 8.0  | is353 | 187             |                   | Sg6        |              |              |               |
| 10.0         | 3.0  | 1.0  | 1.0  | 17.0 | 1.5  | 4.0  | 8.0  | 8.0  | is355 | 187             |                   | Sg6        |              |              |               |
| 10.0         | 3.0  | 1.0  | 1.0  | 17.0 | 1.5  | 4.0  | 8.0  | 8.0  | is369 | 187             |                   | Sg6</      |              |              |               |
