# Supplementary material for: Comparative Genomics Reveal That Host-Innate Immune Responses Influence the Clinical Prevalence of Legionella pneumophila Serogroups
Source: PubMed Central journal article supplement (PMC3694923; doi:10.1371/journal.pone.0067298), 2013-06-27
Supplement: pone.0067298.s003.pdf [file pone.0067298.s003.pdf]

**Table S1:**

|                                       | <b>Thunder Bay</b> | <b>Sudbury</b> | <b>Mississauga</b> |
|---------------------------------------|--------------------|----------------|--------------------|
| <b>Genome Size (b.p.)</b>             | 3,455,167          | 3,352,937      | 3,385,633          |
| <b>% GC</b>                           | 38.23              | 38.19          | 38.19              |
| <b>CDS</b>                            | 3089               | 2898           | 2884               |
| <b>Coverage</b>                       | 118X               | 98X            | 98X                |
| <b>Number of SNP with Thunder Bay</b> | -                  | 4,817          | 79,039             |
| <b>% of SNPs in CDS</b>               | -                  | 88.18          | 63.62              |
